# Supplementary material for: Construction of highly functionalized naphthalenes using an in situ ene–allene strategy
Source: Royal Society of Chemistry journal article supplement (doi:10.1039/c6ra21889j), 2016-01-01

**Supporting Information**  
**For**  
**Construction of Highly Functionalized Naphthalenes Using *in situ***  
**Ene–Allene Strategy**

Dianpeng Chen,<sup>a,b</sup> Gangdong Xing,<sup>b</sup> Jinzhong Yao,<sup>a,\*</sup> and Hongwei Zhou<sup>a,b,\*</sup>

<sup>a</sup> College of Biological, Chemical Sciences and Engineering, Jiaxing University, Jiaxing 314001, People's

Republic of China; E-mail: jzyao2002@163.com

<sup>b</sup> Department of Chemistry, Zhejiang University (Campus Xixi), Hangzhou 310028, People's Republic of China

Fax: (+86) 573-83643264; E-mail: zhouhw@zju.edu.cn

---

**Table of contents**

|                                                                      |            |
|----------------------------------------------------------------------|------------|
| <b>General information</b>                                           | <b>P2</b>  |
| <b>General procedure for synthesis of substrates</b>                 | <b>P2</b>  |
| <b>General procedure for the reaction</b>                            | <b>P5</b>  |
| <b>The spectroscopic data of compounds</b>                           | <b>P7</b>  |
| <b>The <sup>1</sup>H and <sup>13</sup>C NMR spectra of compounds</b> | <b>P19</b> |

## 1. General information

All reactions were carried out in oven-dried glassware sealed with rubber septa under nitrogen condition. All solvents were distilled under nitrogen atmosphere prior to use. THF was dried over sodium hydride, and toluene was dried over sodium. Purification of products was conducted by flash chromatography on silica gel (200-300 mesh). NMR spectra were measured on a Varian 400 ( $^1\text{H}$  at 400 MHz,  $^{13}\text{C}$  at 100 MHz) magnetic resonance spectrometer. Chemical shifts are reported in ppm using tetramethylsilane as internal standard (s = singlet, d = doublet, t = triplet, q = quartet, dd = doublet of doublets, m = multiplet). Infrared spectra were recorded on a Nicolet Avatar 330 Fourier transform spectrometer (FT-IR) and are reported in wave numbers ( $\text{cm}^{-1}$ ). MS data were obtained on an Agilent 5975C inert 350 EI mass spectrometer (GC-MS). HRMS data were obtained on a VG ZAB-HS mass spectrometer, Bruker Apex IV FTMS spectrometer. Compounds described in the literature were characterized by comparison of their  $^1\text{H}$ , and/or  $^{13}\text{C}$  NMR spectra to the previously reported data.

## 2. General procedure for substrates

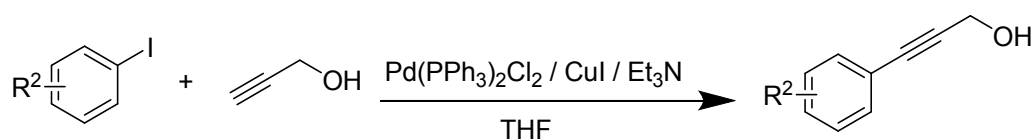

Under nitrogen condition,  $\text{Pd(PPh}_3)_2\text{Cl}_2$  (1mmol),  $\text{CuI}$  (2mmol) and iodine substrates (50mmol) were successively added to a 250mL vial equipped with a stir bar. THF (100mL) was added using a syringe, then propargyl alcohol (60mmol) was added to the mixture.  $\text{Et}_3\text{N}$  (150mmol) was added at last. The reaction was stirred at room temperature for 8h. Solvent was removed in vacuo leaving a crude mixture, which is purified by silica gel column chromatography to afford pure product (PE:EA=5:1).

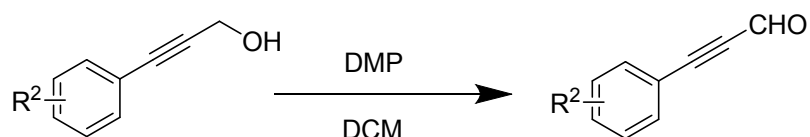

To a solution of the substrates (25mmol) in DCM (50mL) were added DMP (25mmol) at 0 °C. The resulting solution was stirred for 1 h at room temperature. The reaction was quenched with saturated sodium hyposulfite solution (50mL), extracted with DCM (3×25mL) and dried over anhydrous Na<sub>2</sub>SO<sub>4</sub>. After removal of solvent, the residue left was the crude product which can be directly used in the next step.

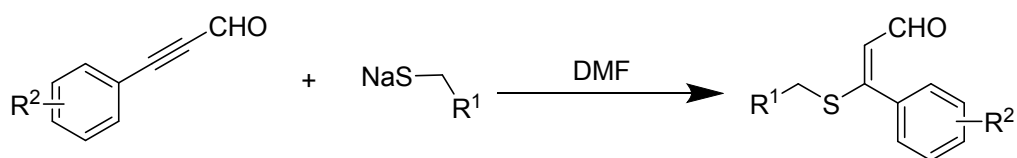

Sodium sulfur compounds (10mmol, 15% in water) were added to a solution of substrates (10mmol) in DMF (20 mL) at 0 °C. The resulting mixture was stirred for 1min. The reaction was then quenched by adding 50mL water and extracted with ether (3×15mL). The combined organics were dried over anhydrous Na<sub>2</sub>SO<sub>4</sub>. After removal of solvent the residue, left was purified by flash column chromatography with silica gel using mixture of petroleum ether and ethyl acetate (10:1) to give the title substrates.

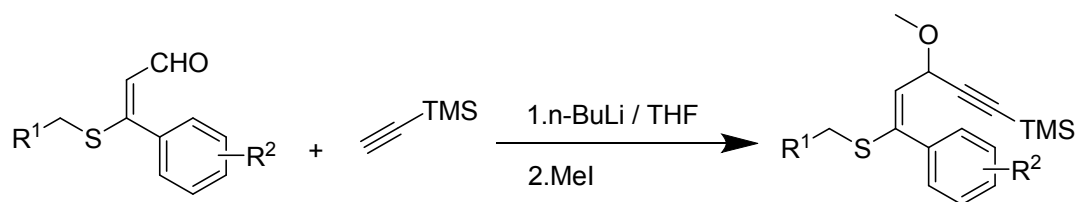

To a solution of the ethynyltrimethylsilane (5mmol) in dry THF (5mL) was added n-BuLi (2mL, 2.5mmol/mL) at -78 °C under argon. The resulting solution was stirred for 0.5 h at room temperature. Then the substrate (5mmol) in dry THF (5mL) was added slowly at -78 °C and the solution was stirred for 2 h at room temperature.

Methyl iodide (12mmol) was added at last. The reaction was stirred at 50 °C for 8h. The reaction was quenched with water (20mL), extracted with ethyl acetate (3×15mL) and dried over anhydrous Na<sub>2</sub>SO<sub>4</sub>. After removal of solvent, the residue left was the crude product which can be directly used in the next step.

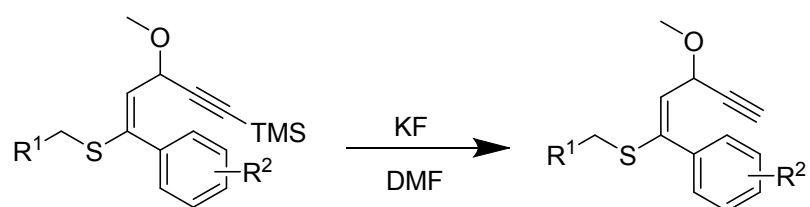

Potassium fluoride (5mmol) was added to a solution of substrates (2mmol) in DMF (4mL) at room temperature. The resulting mixture was stirred for 2 h. The reaction was then quenched by adding 20mL water and extracted with ether (3×15mL). The combined organics were dried over anhydrous Na<sub>2</sub>SO<sub>4</sub>. After removal of solvent, the residue left was purified by flash column chromatography with silica gel using mixture of petroleum ether and ethyl acetate (20:1) to give the title substrates.

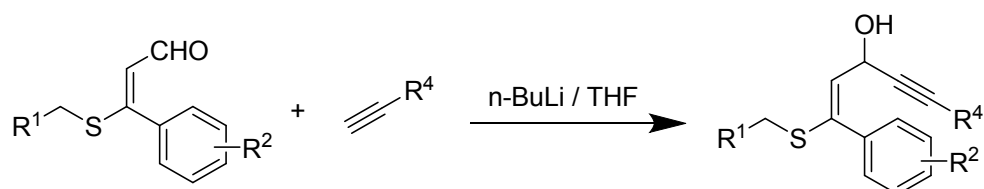

To a solution of the alkynyl compounds (2.5mmol) in dry THF (5mL) was added n-BuLi (1mL, 2.5mmol/mL) at -78 °C under argon. The resulting solution was stirred for 0.5 h at room temperature. Then substrates (5mmol) in dry THF (5mL) were added slowly at -78 °C and the solution was stirred for 2 h at room temperature. The reaction was quenched with water (20mL), extracted with ethyl acetate (3×15mL) and dried over anhydrous Na<sub>2</sub>SO<sub>4</sub>. Solvent was removed in vacuo to leave a crude mixture, which is purified by silica gel column chromatography to afford pure product (PE:EA=5:1).

### 3. General procedure for the reaction

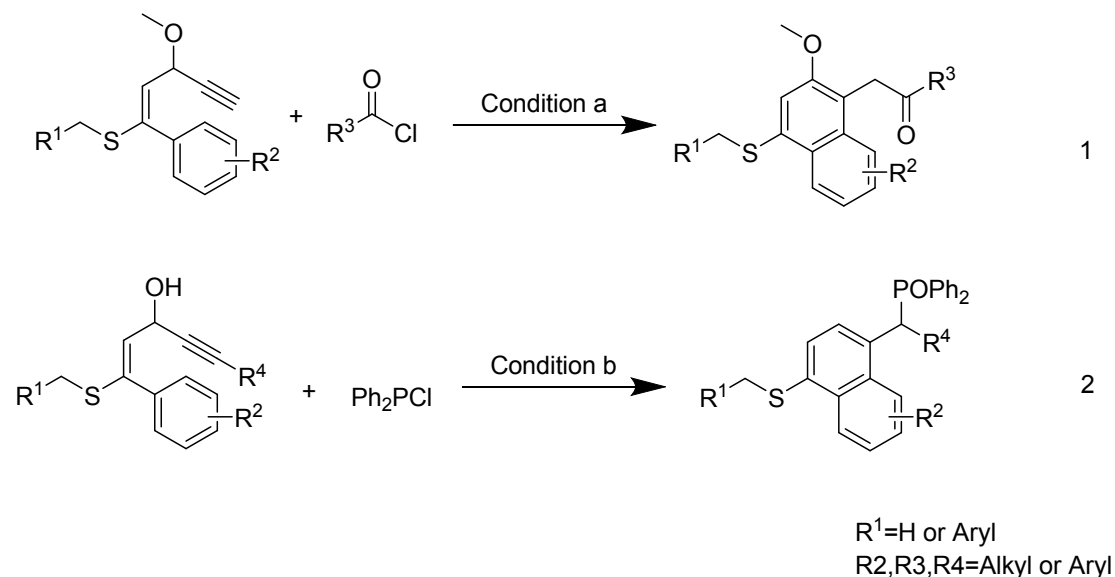

Condition a: Pd(PPh<sub>3</sub>)<sub>2</sub>Cl<sub>2</sub> / CuI / Et<sub>3</sub>N / dry THF / 60 °C

Condition b: Ga(OTf)<sub>3</sub> / Et<sub>3</sub>N / dry THF / 0 °C~60 °C

For the reaction 1: Under nitrogen condition, Pd(PPh<sub>3</sub>)<sub>2</sub>Cl<sub>2</sub> (18mg, 0.025mmol, 0.05eq), CuI (5mg, 0.025mmol, 0.05eq) and substrates (0.5mmol, 1eq) were successively added to a 25mL vial equipped with a stir bar. Dry THF (5.0mL) was added using a syringe, then acyl chloride (0.6mmol, 1.2eq) was added to the mixture. Et<sub>3</sub>N (150mg, 1.5mmol, 3eq) was added at last. The reaction was stirred at 60 °C for 12h. Solvent was removed in vacuo to leave a crude mixture, which is purified by silica gel column chromatography to afford pure product (PE:EA=20:1).

For the reaction 2: Under nitrogen condition, substrates (0.5mmol, 1eq), Et<sub>3</sub>N (150mg, 1.5mmol, 3eq) and dry THF (5.0ml) were successively added to a 25mL vial equipped with a stir bar. Chlorodiphenyl phosphine (120mg, 0.6mmol, 1.1eq) was added using a syringe at 0 °C. The reaction was stirred at room temperature for 2h. Then Ga(OTf)<sub>3</sub> (13mg, 0.025mmol, 0.05eq) was added to the mixture, and the reaction was stirred at 60 °C for 8h. Solvent was removed in vacuo to leave a crude mixture, which is purified by silica gel column chromatography to afford pure product (DCM:EA=5:1).

## The noesy of (E)-3-(methylthio)-3-phenylacrylaldehyde.

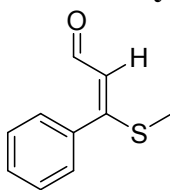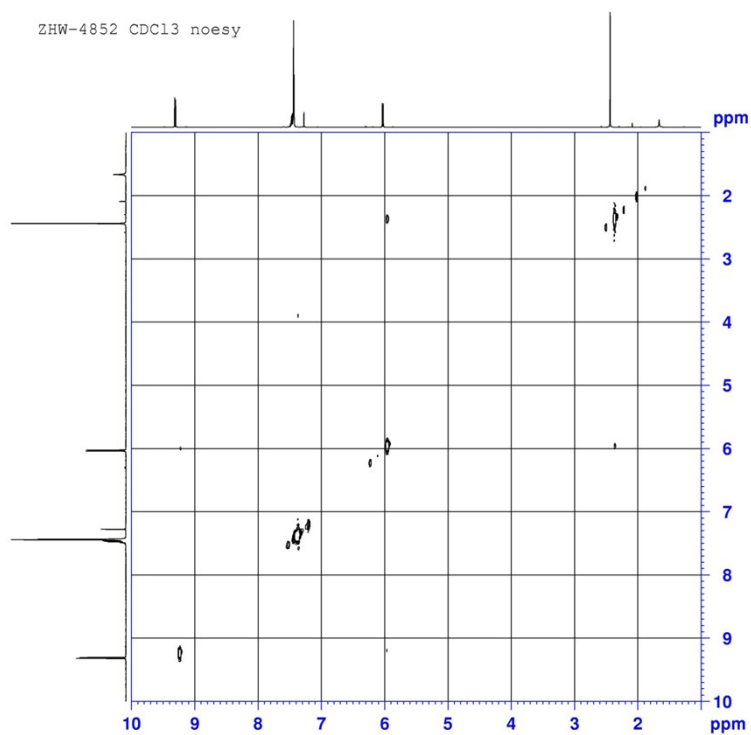

## ORTEP Representation (2,4-dinitrophenyl)hydrazone of 3d

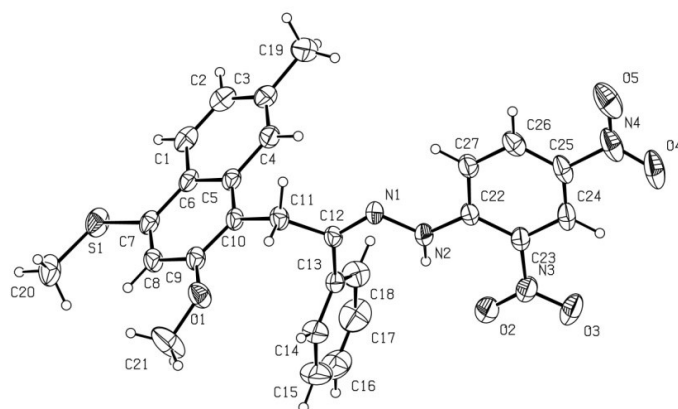

Bond precision: C-C = 0.0036 Å Wavelength=0.71073

Cell: a=11.3897(16) b=8.3907(12) c=26.863(3)  
 alpha=90 beta=100.495(12) gamma=90

Temperature: 293 K

|                        | Calculated      | Reported        |
|------------------------|-----------------|-----------------|
| Volume                 | 2524.3(6)       | 2524.3(6)       |
| Space group            | P 21/n          | P 1 21/n 1      |
| Hall group             | -P 2yn          | -P 2yn          |
| Moiety formula         | C27 H24 N4 O5 S | C27 H24 N4 O5 S |
| Sum formula            | C27 H24 N4 O5 S | C27 H24 N4 O5 S |
| Mr                     | 516.56          | 516.56          |
| Dx, g cm <sup>-3</sup> | 1.359           | 1.359           |
| Z                      | 4               | 4               |
| Mu (mm <sup>-1</sup> ) | 0.174           | 0.174           |
| F000                   | 1080.0          | 1080.0          |
| F000'                  | 1080.97         |                 |
| h, k, lmax             | 13, 10, 32      | 13, 10, 32      |
| Nref                   | 4618            | 4578            |
| Tmin, Tmax             | 0.967, 0.979    | 0.955, 1.000    |
| Tmin'                  | 0.966           |                 |

Correction method= # Reported T Limits: Tmin=0.955 Tmax=1.000  
 AbsCorr = MULTI-SCAN

Data completeness= 0.991 Theta(max)= 25.350

R(reflections)= 0.0467( 2882) wR2(reflections)= 0.1208( 4578)

S = 1.012 Npar= 337

#### 4. Characterization data

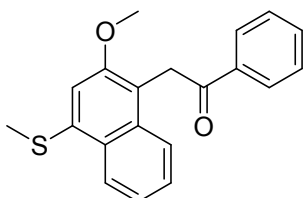

**3a**

**2-(2-methoxy-4-(methylthio)naphthalen-1-yl)-1-phenylethanone(3a):** Pale amorphous solid, 140mg, 87% yield; <sup>1</sup>H NMR (400 MHz, CDCl<sub>3</sub>) δ 8.29 – 8.23 (m, 1H), 8.11 (dd, *J* = 5.2, 3.3 Hz, 2H), 7.73 (d, *J* = 8.4 Hz, 1H), 7.60 – 7.54 (m, 1H), 7.50 – 7.43 (m, 3H), 7.38 (ddd, *J* = 8.1, 6.8, 1.2 Hz, 1H), 7.26 (s, 1H), 4.74 (s, 2H), 3.92 (s, 3H), 2.58 (s, 3H); <sup>13</sup>C NMR (100 MHz, CDCl<sub>3</sub>) δ 197.8, 154.4, 137.0, 136.7, 133.8, 133.0, 128.5, 128.3, 127.8, 127.1, 125.0, 123.7, 123.7, 115.0, 112.4, 56.7, 35.7, 16.8; IR (neat) 3415, 1620, 1384cm<sup>-1</sup>; HRMS (EI-TOF) calcd for C<sub>20</sub>H<sub>18</sub>O<sub>2</sub>S 322.1028, found 322.1031.

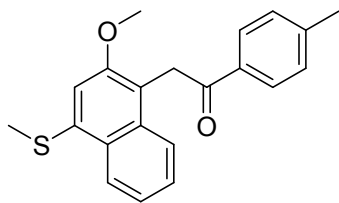

**3b**

**2-(2-methoxy-4-(methylthio)naphthalen-1-yl)-1-p-tolyloethanone(3b):** Pale amorphous solid, 138mg, 83% yield;  $^1\text{H}$  NMR (400 MHz,  $\text{CDCl}_3$ )  $\delta$  8.30 – 8.21 (m, 1H), 8.01 (d,  $J$  = 8.2 Hz, 2H), 7.73 (d,  $J$  = 8.4 Hz, 1H), 7.46 – 7.41 (m, 1H), 7.37 (ddd,  $J$  = 8.1, 6.8, 1.3 Hz, 2H), 7.28 (s, 1H), 7.24 (s, 1H), 4.71 (s, 2H), 3.92 (s, 3H), 2.57 (s, 3H), 2.41 (s, 3H);  $^{13}\text{C}$  NMR (100 MHz,  $\text{CDCl}_3$ )  $\delta$  197.4, 154.2, 143.8, 129.2, 128.4, 127.0, 124.9, 123.8, 123.7, 56.8, 35.6, 21.7, 16.8; IR (neat) 3416, 1621, 1189 $\text{cm}^{-1}$ ; HRMS (EI-TOF) calcd for  $\text{C}_{21}\text{H}_{20}\text{O}_2\text{S}$  336.1184, found 336.1185.

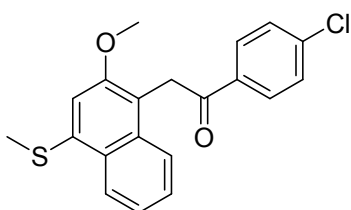

**3c**

**1-(4-chlorophenyl)-2-(2-methoxy-4-(methylthio)naphthalen-1-yl)ethanone(3c):** Pale amorphous solid, 153mg, 86% yield;  $^1\text{H}$  NMR (400 MHz,  $\text{CDCl}_3$ )  $\delta$  8.25 (d,  $J$  = 8.4 Hz, 1H), 8.03 (d,  $J$  = 7.9 Hz, 2H), 7.73 (d,  $J$  = 8.4 Hz, 1H), 7.41 (dt,  $J$  = 15.2, 7.9 Hz, 4H), 7.24 (d,  $J$  = 0.9 Hz, 1H), 4.68 (s, 2H), 3.92 (s, 3H), 2.57 (s, 3H);  $^{13}\text{C}$  NMR (100 MHz,  $\text{CDCl}_3$ )  $\delta$  196.9, 154.3, 139.4, 137.0, 135.2, 133.6, 129.8, 128.8, 127.2, 124.9, 123.8, 123.6, 114.5, 112.1, 56.7, 35.8, 16.7; IR (neat) 3415, 1621, 1191 $\text{cm}^{-1}$ ; HRMS (EI-TOF) calcd for  $\text{C}_{20}\text{H}_{17}\text{ClO}_2\text{S}$  356.0638, found 356.0634.

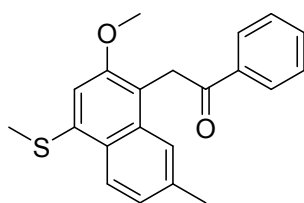

**3d**



**1-(4-chlorophenyl)-2-(2-methoxy-4-(methylthio)naphthalen-1-yl)ethanone(3d):**

Pale amorphous solid, 136mg, 81% yield;  $^1\text{H}$  NMR (400 MHz,  $\text{CDCl}_3$ )  $\delta$  8.17 – 8.09 (m, 3H), 7.60 – 7.55 (m, 1H), 7.48 (dd,  $J = 10.3, 4.8$  Hz, 3H), 7.22 – 7.17 (m, 2H), 4.71 (s, 2H), 3.90 (s, 3H), 2.56 (s, 3H), 2.43 (s, 3H);  $^{13}\text{C}$  NMR (100 MHz,  $\text{CDCl}_3$ )  $\delta$  197.9, 154.5, 137.1, 136.8, 136.4, 134.0, 133.0, 128.5, 128.3, 126.0, 124.8, 122.8, 114.3, 111.5, 56.6, 35.7, 22.0, 16.8; IR (neat) 3415, 1620, 1191  $\text{cm}^{-1}$ ; HRMS (EI-TOF) calcd for  $\text{C}_{21}\text{H}_{20}\text{O}_2\text{S}$  336.1184, found 336.1187.

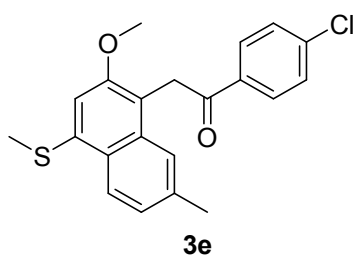

**1-(4-chlorophenyl)-2-(2-methoxy-7-methyl-4-(methylthio)naphthalen-1-yl)ethanone(3e):**

Pale amorphous solid, 148mg, 80% yield;  $^1\text{H}$  NMR (400 MHz,  $\text{CDCl}_3$ )  $\delta$  8.14 (d,  $J = 8.6$  Hz, 1H), 8.06 – 8.01 (m, 2H), 7.48 (s, 1H), 7.45 – 7.40 (m, 2H), 7.21 (dd,  $J = 8.6, 1.5$  Hz, 1H), 7.16 (s, 1H), 4.65 (s, 2H), 3.90 (s, 3H), 2.56 (s, 3H), 2.44 (s, 3H);  $^{13}\text{C}$  NMR (100 MHz,  $\text{CDCl}_3$ )  $\delta$  197.0, 154.4, 139.3, 136.9, 136.7, 135.3, 133.9, 129.8, 128.8, 126.0, 124.8, 122.7, 113.9, 111.2, 56.6, 35.8, 22.0, 16.7; IR (neat) 3416, 1621, 1204  $\text{cm}^{-1}$ ; HRMS (EI-TOF) calcd for  $\text{C}_{21}\text{H}_{19}\text{ClO}_2\text{S}$  370.0794, found 370.0797.

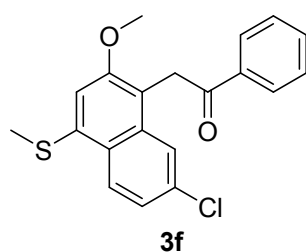

**2-(7-chloro-2-methoxy-4-(methylthio)naphthalen-1-yl)-1-phenylethanone(3f):**

Pale amorphous solid, 153mg, 86% yield;  $^1\text{H}$  NMR (400 MHz,  $\text{CDCl}_3$ )  $\delta$  8.19 (d,  $J = 9.0$  Hz, 1H), 8.15 – 8.09 (m, 2H), 7.67 (d,  $J = 1.9$  Hz, 1H), 7.59 (d,  $J = 7.4$  Hz, 1H),

7.50 (t,  $J = 7.6$  Hz, 2H), 7.30 (dd,  $J = 9.0, 2.0$  Hz, 1H), 7.22 (s, 1H), 4.68 (s, 2H), 3.91 (s, 3H), 2.57 (s, 3H);  $^{13}\text{C}$  NMR (100 MHz,  $\text{CDCl}_3$ )  $\delta$  197.2, 155.3, 137.1, 136.8, 134.8, 133.3, 133.2, 130.3, 128.6, 128.3, 126.7, 126.0, 124.4, 122.6, 114.2, 112.2, 56.5, 35.5, 16.8; IR (neat) 3416, 1620, 1191 $\text{cm}^{-1}$ ; HRMS (EI-TOF) calcd for  $\text{C}_{20}\text{H}_{17}\text{ClO}_2\text{S}$  356.0638, found 356.0638.

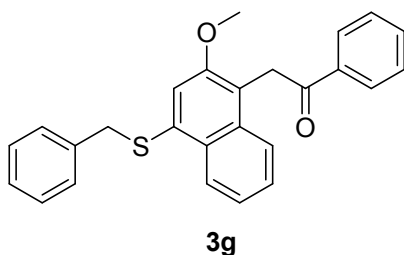

**2-(4-(benzylthio)-2-methoxynaphthalen-1-yl)-1-phenylethanone(3g):** Pale amorphous solid, 148mg, 75% yield;  $^1\text{H}$  NMR (400 MHz,  $\text{CDCl}_3$ )  $\delta$  8.44 (dd,  $J = 8.3, 0.9$  Hz, 1H), 8.13 – 8.07 (m, 2H), 7.76 (d,  $J = 8.0$  Hz, 1H), 7.61 – 7.55 (m, 1H), 7.46 (ddd,  $J = 8.3, 7.2, 4.0$  Hz, 3H), 7.40 (ddd,  $J = 8.1, 6.8, 1.2$  Hz, 1H), 7.23 (m, 6H), 4.73 (s, 2H), 4.12 (s, 2H), 3.72 (s, 3H);  $^{13}\text{C}$  NMR (100 MHz,  $\text{CDCl}_3$ )  $\delta$  197.7, 153.9, 137.5, 137.0, 134.0, 133.7, 133.0, 129.0, 128.9, 128.5, 128.4, 128.3, 127.2, 127.0, 125.8, 124.0, 123.8, 117.7, 116.7, 56.5, 39.7, 35.9; IR (neat) 3415, 1620, 1383 $\text{cm}^{-1}$ ; HRMS (EI-TOF) calcd for  $\text{C}_{26}\text{H}_{22}\text{O}_2\text{S}$  398.1341, found 398.1341.

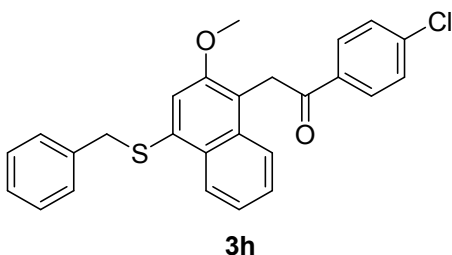

**2-(4-(benzylthio)-2-methoxynaphthalen-1-yl)-1-(4-chlorophenyl)ethanone(3h):** Pale amorphous solid, 155mg, 72% yield;  $^1\text{H}$  NMR (400 MHz,  $\text{CDCl}_3$ )  $\delta$  8.43 (dd,  $J = 8.3, 0.8$  Hz, 1H), 8.05 – 7.97 (m, 2H), 7.75 (d,  $J = 8.2$  Hz, 1H), 7.43 (m, 5H), 7.23 – 7.20 (m, 3H), 7.19 (s, 2H), 4.67 (s, 2H), 4.12 (s, 2H), 3.72 (s, 3H);  $^{13}\text{C}$  NMR (100 MHz,  $\text{CDCl}_3$ )  $\delta$  196.8, 153.8, 139.4, 137.5, 135.2, 134.0, 133.8, 129.7, 129.0, 128.9,

128.8, 128.5, 127.2, 127.1, 125.8, 124.0, 123.6, 117.5, 116.2, 56.4, 39.6, 36.0; IR (neat) 3416, 1621, 1191 $\text{cm}^{-1}$ ; HRMS (EI-TOF) calcd for  $\text{C}_{26}\text{H}_{21}\text{ClO}_2\text{S}$  432.0951, found 432.0955.

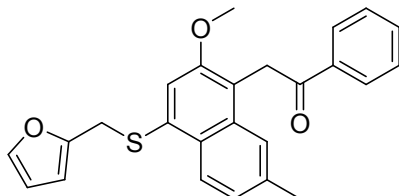

**3i**

**2-(4-(furan-2-ylmethylthio)-2-methoxy-7-methylnaphthalen-1-yl)-1-**

**phenylethanone(3i):** Pale amorphous solid, 152mg, 76% yield;  $^1\text{H}$  NMR (400 MHz,  $\text{CDCl}_3$ )  $\delta$  8.32 (d,  $J = 8.6$  Hz, 1H), 8.13 – 8.06 (m, 2H), 7.57 (d,  $J = 7.4$  Hz, 1H), 7.50 – 7.46 (m, 3H), 7.34 (d,  $J = 1.0$  Hz, 1H), 7.23 (d,  $J = 9.4$  Hz, 2H), 6.24 – 6.17 (m, 1H), 5.93 (d,  $J = 2.9$  Hz, 1H), 4.72 (s, 2H), 4.08 (s, 2H), 3.80 (s, 3H), 2.44 (s, 3H);  $^{13}\text{C}$  NMR (100 MHz,  $\text{CDCl}_3$ )  $\delta$  197.7, 154.0, 150.9, 142.1, 137.0, 136.8, 134.2, 133.0, 132.6, 128.5, 128.3, 127.7, 126.4, 125.8, 122.7, 118.0, 116.7, 110.5, 108.2, 56.5, 35.9, 32.4, 22.0; IR (neat) 3416, 1623, 1385 $\text{cm}^{-1}$ ; HRMS (EI-TOF) calcd for  $\text{C}_{25}\text{H}_{22}\text{O}_3\text{S}$  402.1290, found 402.1285.

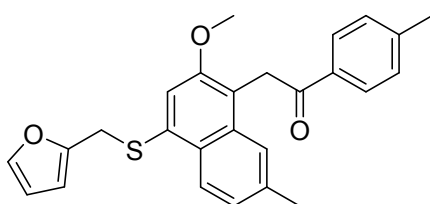

**3j**

**2-(4-(furan-2-ylmethylthio)-2-methoxy-7-methylnaphthalen-1-yl)-1-*p*-**

**tolylethanone(3j):** Pale amorphous solid, 146mg, 70% yield;  $^1\text{H}$  NMR (400 MHz,  $\text{CDCl}_3$ )  $\delta$  8.31 (d,  $J = 8.6$  Hz, 1H), 8.01 (d,  $J = 8.2$  Hz, 2H), 7.50 (s, 1H), 7.36 – 7.32 (m, 1H), 7.29 (s, 1H), 7.27 – 7.20 (m, 3H), 6.22 (dd,  $J = 3.1, 1.9$  Hz, 1H), 5.93 (d,  $J = 2.8$  Hz, 1H), 4.70 (s, 2H), 4.08 (s, 2H), 3.79 (s, 3H), 2.43 (d,  $J = 6.3$  Hz, 6H);  $^{13}\text{C}$  NMR (100 MHz,  $\text{CDCl}_3$ )  $\delta$  197.3, 154.0, 150.9, 143.8, 142.1, 136.7, 134.5, 134.2,

132.5, 129.2, 128.4, 127.7, 126.4, 125.8, 122.8, 118.1, 117.0, 110.5, 108.2, 105.0, 56.5, 35.7, 32.4, 22.0, 21.7; IR (neat) 3415, 1619, 1384 $\text{cm}^{-1}$ ; HRMS (EI-TOF) calcd for  $\text{C}_{24}\text{H}_{24}\text{O}_3\text{S}$  416.1446, found 416.1443.

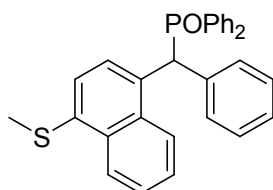

**5a**

**((4-(methylthio)naphthalen-1-yl)(phenyl)methyl)diphenylphosphine oxide(5a):**

Pale amorphous solid, 187mg, 81% yield;  $^1\text{H}$  NMR (400 MHz,  $\text{CDCl}_3$ )  $\delta$  8.55 (d,  $J$  = 7.8 Hz, 1H), 8.26 – 8.19 (m, 1H), 8.02 (dd,  $J$  = 6.6, 3.1 Hz, 1H), 7.68 – 7.60 (m, 2H), 7.44 (m, 5H), 7.33 – 7.21 (m, 8H), 7.14 – 7.04 (m, 3H), 5.47 (d,  $J$  = 10.6 Hz, 1H), 2.49 (s, 3H);  $^{13}\text{C}$  NMR (100 MHz,  $\text{CDCl}_3$ )  $\delta$  135.7, 135.4 (d,  $J$  = 6.0 Hz), 132.7, 132.4, 131.8 (d,  $J$  = 5.0 Hz), 131.7, 131.4 (d,  $J$  = 2.0 Hz), 131.3 (d,  $J$  = 8.0 Hz), 131.2, 131.1 (d,  $J$  = 8.0 Hz), 130.8, 128.4, 128.2 (d,  $J$  = 6.0 Hz), 128.1, 126.9 (d,  $J$  = 2.0 Hz), 126.7, 125.5, 125.1, 123.1, 122.5, 47.7 (d,  $J$  = 67.0 Hz), 15.6;  $^{31}\text{P}$  NMR (160 MHz,  $\text{CDCl}_3$ )  $\delta$  32.82; IR (neat) 3416, 1621, 1179 $\text{cm}^{-1}$ ; HRMS (EI-TOF) calcd for  $\text{C}_{30}\text{H}_{25}\text{OPS}$  464.1364, found 464.1365.

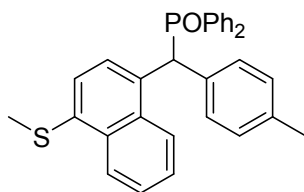

**5b**

**((4-(methylthio)naphthalen-1-yl)(p-tolyl)methyl)diphenylphosphine oxide(5b):**

Pale amorphous solid, 186mg, 78% yield;  $^1\text{H}$  NMR (400 MHz,  $\text{CDCl}_3$ )  $\delta$  8.52 (d,  $J$  = 7.7 Hz, 1H), 8.27 – 8.17 (m, 1H), 8.08 – 7.98 (m, 1H), 7.69 – 7.60 (m, 2H), 7.52 (dd,  $J$  = 10.5, 7.9 Hz, 2H), 7.46 – 7.38 (m, 3H), 7.25 (m, 8H), 6.90 (d,  $J$  = 7.9 Hz, 2H), 5.47 (d,  $J$  = 10.5 Hz, 1H), 2.47 (s, 3H), 2.18 (s, 3H);  $^{13}\text{C}$  NMR (100 MHz,  $\text{CDCl}_3$ )  $\delta$

136.5 (d,  $J = 2.0$  Hz), 135.5, 133.6, 133.0, 132.6, 132.4 (d,  $J = 6.0$  Hz), 132.0, 131.9, 131.7 (d,  $J = 9.0$  Hz), 131.3 (d,  $J = 9.0$  Hz), 131.1 (d,  $J = 2.0$  Hz), 129.9 (d,  $J = 6.0$  Hz), 128.8 (d,  $J = 2.0$  Hz), 128.4, 128.3 (d,  $J = 7.0$  Hz), 128.1 (d,  $J = 3.0$  Hz), 128.0, 126.7, 125.5, 125.1, 123.2, 122.6, 47.2 (d,  $J = 67.0$  Hz), 21.0, 15.7;  $^{31}\text{P}$  NMR (160 MHz,  $\text{CDCl}_3$ )  $\delta$  32.7; IR (neat) 3416, 1621, 1180 $\text{cm}^{-1}$ ; HRMS (EI-TOF) calcd for  $\text{C}_{31}\text{H}_{27}\text{OPS}$  478.1520, found 478.1523.

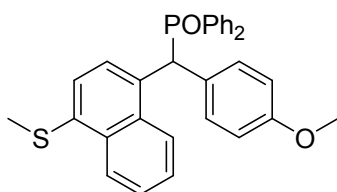

**5c**

**((4-methoxyphenyl)(4-(methylthio)naphthalen-1-yl)methyl)diphenylphosphine oxide(5c):** Pale amorphous solid, 185mg, 75% yield;  $^1\text{H}$  NMR (400 MHz,  $\text{CDCl}_3$ )  $\delta$  8.50 (d,  $J = 7.8$  Hz, 1H), 8.26 – 8.17 (m, 1H), 8.00 (dd,  $J = 6.5, 3.0$  Hz, 1H), 7.66 – 7.60 (m, 2H), 7.51 – 7.39 (m, 5H), 7.31 (m, 3H), 7.25 – 7.20 (m, 3H), 7.18 – 7.12 (m, 2H), 6.63 (d,  $J = 8.6$  Hz, 2H), 5.42 (d,  $J = 10.4$  Hz, 1H), 3.66 (s, 3H), 2.48 (s, 3H);  $^{13}\text{C}$  NMR (100 MHz,  $\text{CDCl}_3$ )  $\delta$  158.4, 135.5, 133.6, 132.9, 132.5, 131.8 (d,  $J = 4.0$  Hz), 131.6 (d,  $J = 9.0$  Hz), 131.4 (d,  $J = 2.0$  Hz), 131.3, 131.2, 131.1, 128.4 (d,  $J = 11.0$  Hz), 128.2 (d,  $J = 4.0$  Hz), 128.1, 127.3 (d,  $J = 6.0$  Hz), 126.7, 125.5, 125.1, 123.2, 122.5, 113.6 (d,  $J = 2.0$  Hz), 105.0, 55.1, 46.8 (d,  $J = 67.0$  Hz), 15.6;  $^{31}\text{P}$  NMR (160 MHz,  $\text{CDCl}_3$ )  $\delta$  32.9; IR (neat) 3417, 1621, 1183 $\text{cm}^{-1}$ ; HRMS (EI-TOF) calcd for  $\text{C}_{31}\text{H}_{27}\text{O}_2\text{PS}$  494.1469, found 494.1465.

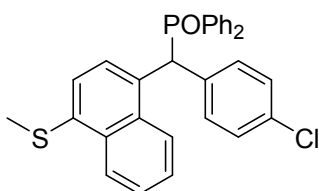

**5d**

**((4-chlorophenyl)(4-(methylthio)naphthalen-1-yl)methyl)diphenylphosphine**

**oxide(5d):** Pale amorphous solid, 209mg, 84% yield;  $^1\text{H}$  NMR (400 MHz,  $\text{CDCl}_3$ )  $\delta$  8.50 (d,  $J = 7.7$  Hz, 1H), 8.22 (dd,  $J = 6.5, 3.2$  Hz, 1H), 8.00 – 7.88 (m, 1H), 7.68 – 7.58 (m, 2H), 7.47 (m, 5H), 7.37 – 7.28 (m, 3H), 7.24 – 7.15 (m, 5H), 7.06 (d,  $J = 8.4$  Hz, 2H), 5.44 (d,  $J = 10.5$  Hz, 1H), 2.49 (s, 3H);  $^{13}\text{C}$  NMR (100 MHz,  $\text{CDCl}_3$ )  $\delta$  136.1, 134.1 (d,  $J = 5.0$  Hz), 133.1, 132.9 (d,  $J = 3.0$  Hz), 132.5, 132.1, 131.8, 131.6 (d,  $J = 2.0$  Hz), 131.5 (d,  $J = 2.0$  Hz), 131.3 (d,  $J = 5.0$  Hz), 131.1 (d,  $J = 9.0$  Hz), 131.0 (d,  $J = 9.0$  Hz), 130.3, 128.6, 128.5, 128.3 (d,  $J = 2.0$  Hz), 128.2 (d,  $J = 7.0$  Hz), 126.8, 125.7, 125.2, 122.9, 122.3, 47.1 (d,  $J = 66.0$  Hz), 15.5;  $^{31}\text{P}$  NMR (160 MHz,  $\text{CDCl}_3$ )  $\delta$  32.5; IR (neat) 3417, 1620, 1189 $\text{cm}^{-1}$ ; HRMS (EI-TOF) calcd for  $\text{C}_{30}\text{H}_{24}\text{ClOPS}$  498.0974, found 498.0973.

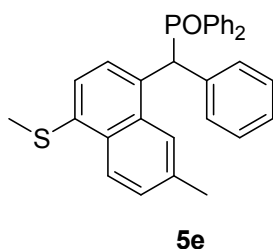

**((7-methyl-4-(methylthio)naphthalen-1-yl)(phenyl)methyl)diphenylphosphine**

**oxide(5e):** Pale amorphous solid, 186mg, 78% yield;  $^1\text{H}$  NMR (400 MHz,  $\text{CDCl}_3$ )  $\delta$  8.48 (d,  $J = 7.8$  Hz, 1H), 8.10 (d,  $J = 8.5$  Hz, 1H), 7.71 (s, 1H), 7.62 (dd,  $J = 10.7, 7.7$  Hz, 2H), 7.50 – 7.38 (m, 3H), 7.34 – 7.25 (m, 5H), 7.24 – 7.15 (m, 4H), 7.10 (d,  $J = 5.4$  Hz, 3H), 5.42 (d,  $J = 10.5$  Hz, 1H), 2.46 (d,  $J = 14.5$  Hz, 6H);  $^{13}\text{C}$  NMR (100 MHz,  $\text{CDCl}_3$ )  $\delta$  136.3, 135.5 (d,  $J = 6.0$  Hz), 135.4, 133.5, 132.8, 132.5, 131.9 (d,  $J = 8.0$  Hz), 131.8, 131.4 (d,  $J = 3.0$  Hz), 131.1 (d,  $J = 9.0$  Hz), 130.1 (d,  $J = 5.0$  Hz), 130.0, 128.4 (d,  $J = 8.0$  Hz), 128.1, 127.6, 126.8, 124.9, 122.3, 121.7, 47.7 (d,  $J = 67.0$  Hz), 22.1, 15.6;  $^{31}\text{P}$  NMR (160 MHz,  $\text{CDCl}_3$ )  $\delta$  32.8; IR (neat) 3416, 1621, 1188 $\text{cm}^{-1}$ ; HRMS (EI-TOF) calcd for  $\text{C}_{31}\text{H}_{27}\text{OPS}$  478.1520, found 478.1524.

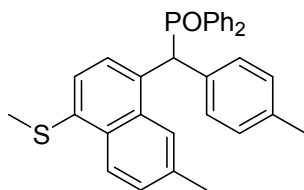

**5f**

**((7-methyl-4-(methylthio)naphthalen-1-yl)(p-tolyl)methyl)diphenylphosphine**

**oxide(5f):** Pale amorphous solid, 187mg, 76% yield;  $^1\text{H}$  NMR (400 MHz,  $\text{CDCl}_3$ )  $\delta$  8.45 (d,  $J = 7.8$  Hz, 1H), 8.10 (d,  $J = 8.6$  Hz, 1H), 7.71 (s, 1H), 7.66 – 7.57 (m, 2H), 7.55 – 7.46 (m, 2H), 7.41 (t,  $J = 6.9$  Hz, 1H), 7.25 (m, 9H), 6.91 (d,  $J = 7.9$  Hz, 2H), 5.42 (d,  $J = 10.4$  Hz, 1H), 2.45 (d,  $J = 8.5$  Hz, 6H), 2.19 (s, 3H);  $^{13}\text{C}$  NMR (100 MHz,  $\text{CDCl}_3$ )  $\delta$  136.5 (d,  $J = 2.0$  Hz), 136.2, 135.2, 133.6, 133.0, 132.5 (d,  $J = 10.0$  Hz), 132.4, 132.1, 131.9 (d,  $J = 9.0$  Hz), 131.4 (d,  $J = 3.0$  Hz), 131.3 (d,  $J = 3.0$  Hz), 131.1 (d,  $J = 8.0$  Hz), 130.3, 130.0 (d,  $J = 5.0$  Hz), 128.8 (d,  $J = 2.0$  Hz), 128.4 (d,  $J = 10.0$  Hz), 128.2, 128.0, 127.6, 124.9, 122.3, 121.7, 47.2 (d,  $J = 67.0$  Hz), 22.1, 21.0, 15.6;  $^{31}\text{P}$  NMR (160 MHz,  $\text{CDCl}_3$ )  $\delta$  32.7; IR (neat) 3419, 1623, 1187 $\text{cm}^{-1}$ ; HRMS (EI-TOF) calcd for  $\text{C}_{32}\text{H}_{29}\text{OPS}$  492.1677, found 492.1678.

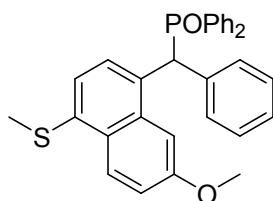

**5g**

**((7-methoxy-4-(methylthio)naphthalen-1-yl)(p-tolyl)methyl)diphenylphosphine**

**oxide(5g):** Pale amorphous solid, 197mg, 80% yield;  $^1\text{H}$  NMR (400 MHz,  $\text{CDCl}_3$ )  $\delta$  8.48 (d,  $J = 7.7$  Hz, 1H), 8.14 (d,  $J = 9.2$  Hz, 1H), 7.71 – 7.60 (m, 2H), 7.48 – 7.34 (m, 4H), 7.31 – 7.20 (m, 7H), 7.15 – 7.05 (m, 5H), 5.29 (d,  $J = 10.7$  Hz, 1H), 3.80 (s, 3H), 2.46 (s, 3H);  $^{13}\text{C}$  NMR (100 MHz,  $\text{CDCl}_3$ )  $\delta$  157.9, 135.4 (d,  $J = 5.0$  Hz), 133.5, 133.2 (d,  $J = 9.0$  Hz), 132.8, 131.8, 131.5 (d,  $J = 2.0$  Hz), 131.3 (d,  $J = 5.0$  Hz), 131.2 (d,  $J = 8.0$  Hz), 131.1, 130.2 (d,  $J = 5.0$  Hz), 129.7 (d,  $J = 3.0$  Hz), 128.9 (d,  $J = 7.0$

Hz), 128.5 (d,  $J = 11.0$  Hz), 128.1, 128.0 (d,  $J = 8.0$  Hz), 127.2, 126.9, 120.4, 116.7, 114.1, 103.4, 55.3, 48.5 (d,  $J = 66.0$  Hz), 15.6;  $^{31}\text{P}$  NMR (160 MHz,  $\text{CDCl}_3$ )  $\delta$  32.4; IR (neat) 3420, 1621, 1182 $\text{cm}^{-1}$ ; HRMS (EI-TOF) calcd for  $\text{C}_{31}\text{H}_{27}\text{O}_2\text{PS}$  494.1469, found 494.1474.

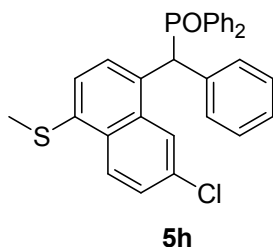

**((7-chloro-4-(methylthio)naphthalen-1-yl)(phenyl)methyl)diphenylphosphine**

**oxide(5h):** Pale amorphous solid, 187mg, 75% yield;  $^1\text{H}$  NMR (400 MHz,  $\text{CDCl}_3$ )  $\delta$  8.54 (d,  $J = 7.9$  Hz, 1H), 8.15 (d,  $J = 9.0$  Hz, 1H), 7.90 (s, 1H), 7.66 – 7.57 (m, 2H), 7.51 – 7.42 (m, 3H), 7.40 – 7.31 (m, 4H), 7.24 (d,  $J = 5.4$  Hz, 5H), 7.15 – 7.08 (m, 3H), 5.31 (d,  $J = 10.5$  Hz, 1H), 2.49 (s, 3H);  $^{13}\text{C}$  NMR (100 MHz,  $\text{CDCl}_3$ )  $\delta$  136.9, 135.9, 135.2 (d,  $J = 5.0$  Hz), 132.8, 131.9, 131.6 (d,  $J = 3.0$  Hz), 131.5 (d,  $J = 3.0$  Hz), 131.3 (d,  $J = 9.0$  Hz), 131.0 (d,  $J = 8.0$  Hz), 130.0, 129.4 (d,  $J = 7.0$  Hz), 128.6, 128.4, 128.2, 128.1, 127.1 (d,  $J = 2.0$  Hz), 126.8, 126.3, 122.7, 122.3, 47.7 (d,  $J = 62.0$  Hz), 15.6;  $^{31}\text{P}$  NMR (160 MHz,  $\text{CDCl}_3$ )  $\delta$  32.8; IR (neat) 3421, 1621, 1190 $\text{cm}^{-1}$ ; HRMS (EI-TOF) calcd for  $\text{C}_{30}\text{H}_{24}\text{ClOPS}$  498.0974, found 498.0976.

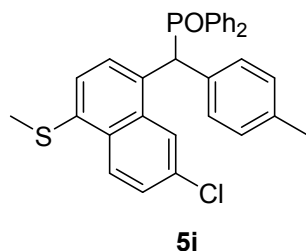

**((7-chloro-4-(methylthio)naphthalen-1-yl)(p-tolyl)methyl)diphenylphosphine**

**oxide(5i):** Pale amorphous solid, 209mg, 82% yield;  $^1\text{H}$  NMR (400 MHz,  $\text{CDCl}_3$ )  $\delta$  8.49 (d,  $J = 7.8$  Hz, 1H), 8.14 (d,  $J = 9.0$  Hz, 1H), 7.89 (d,  $J = 1.9$  Hz, 1H), 7.63 – 7.58 (m, 2H), 7.51 (dd,  $J = 11.1, 7.2$  Hz, 2H), 7.42 (d,  $J = 7.4$  Hz, 1H), 7.38 – 7.30



(m, 4H), 7.26 – 7.22 (m, 3H), 7.14 (d,  $J = 6.6$  Hz, 2H), 6.93 (d,  $J = 7.9$  Hz, 2H), 5.29 (d,  $J = 10.4$  Hz, 1H), 2.49 (s, 3H), 2.20 (s, 3H);  $^{13}\text{C}$  NMR (100 MHz,  $\text{CDCl}_3$ )  $\delta$  136.7, 135.8, 133.1, 132.7 (d,  $J = 12.0$  Hz), 132.5, 132.1 (d,  $J = 5.0$  Hz), 131.5, 131.3 (d,  $J = 8.0$  Hz), 131.0 (d,  $J = 8.0$  Hz), 130.2, 130.1, 129.8 (d,  $J = 5.0$  Hz), 129.4 (d,  $J = 7.0$  Hz), 129.1, 128.5, 128.4, 128.2 (d,  $J = 12.0$  Hz), 126.8, 126.2, 122.8, 122.3, 105.0, 47.2 (d,  $J = 66.0$  Hz), 21.0, 15.6;  $^{31}\text{P}$  NMR (160 MHz,  $\text{CDCl}_3$ )  $\delta$  32.4; IR (neat) 3416, 1622,  $1188\text{cm}^{-1}$ ; HRMS (EI-TOF) calcd for  $\text{C}_{31}\text{H}_{26}\text{ClOPS}$  512.1131, found 512.1135.

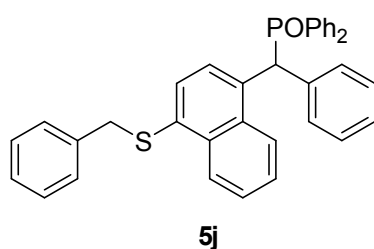

**diphenyl(phenyl(4-(phenylthio)naphthalen-1-yl)methyl)phosphine oxide(5j):**

Pale amorphous solid, 191mg, 71% yield;  $^1\text{H}$  NMR (400 MHz,  $\text{CDCl}_3$ )  $\delta$  7.56 – 7.46 (m, 5H), 7.43 (t,  $J = 7.1$  Hz, 3H), 7.36 (d,  $J = 6.8$  Hz, 1H), 7.32 – 7.28 (m, 7H), 7.27 (s, 3H), 7.19 (t,  $J = 7.4$  Hz, 1H), 7.13 (d,  $J = 7.2$  Hz, 3H), 7.03 (d,  $J = 6.7$  Hz, 2H), 6.90 (s, 1H), 5.02 (d,  $J = 10.3$  Hz, 1H), 3.63 (s, 2H);  $^{13}\text{C}$  NMR (100 MHz,  $\text{CDCl}_3$ )  $\delta$  143.3, 138.9 (d,  $J = 9.0$  Hz), 135.8 (d,  $J = 4.0$  Hz), 134.1, 131.7 (d,  $J = 4.0$  Hz), 131.5, 131.3 (d,  $J = 8.0$  Hz), 131.2, 129.0, 128.7, 128.6, 128.5, 128.4 (d,  $J = 11.0$  Hz), 128.2, 128.1, 127.3, 127.0, 126.3, 125.4, 124.6, 46.9 (d,  $J = 67.0$  Hz), 34.4;  $^{31}\text{P}$  NMR (160 MHz,  $\text{CDCl}_3$ )  $\delta$  31.3; IR (neat) 3415, 1621,  $1190\text{cm}^{-1}$ ; HRMS (EI-TOF) calcd for  $\text{C}_{36}\text{H}_{29}\text{OPS}$  540.1677, found 540.1677.

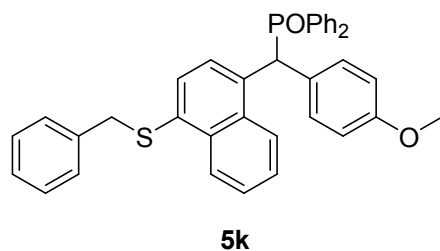

**((4-methoxyphenyl)(4-(phenylthio)naphthalen-1-yl)methyl)diphenylphosphine**

**oxide(5k):** Pale amorphous solid, 194mg, 68% yield;  $^1\text{H}$  NMR (400 MHz,  $\text{CDCl}_3$ )  $\delta$  7.53 (d,  $J = 7.5$  Hz, 3H), 7.47 (d,  $J = 8.0$  Hz, 3H), 7.45 – 7.35 (m, 3H), 7.30 (d,  $J = 7.3$  Hz, 6H), 7.27 (s, 2H), 7.20 (d,  $J = 7.5$  Hz, 3H), 7.02 (d,  $J = 6.8$  Hz, 2H), 6.89 (s, 1H), 6.67 (d,  $J = 8.5$  Hz, 2H), 4.98 (d,  $J = 10.3$  Hz, 1H), 3.70 (s, 3H), 3.60 (s, 2H);  $^{13}\text{C}$  NMR (100 MHz,  $\text{CDCl}_3$ )  $\delta$  158.5, 143.2, 139.9, 138.7, 134.1, 131.6 (d,  $J = 8.0$  Hz), 131.5 (d,  $J = 10.0$  Hz), 131.3 (d,  $J = 4.0$  Hz), 131.2, 130.9, 128.6 (d,  $J = 9.0$  Hz), 128.4, 128.3 (d,  $J = 9.0$  Hz), 128.1, 127.8, 127.5, 127.2, 126.3, 125.4, 124.6, 113.8, 55.2, 45.9 (d,  $J = 67.0$  Hz), 34.4;  $^{31}\text{P}$  NMR (160 MHz,  $\text{CDCl}_3$ )  $\delta$  31.3; IR (neat) 3416, 1621,  $1186\text{cm}^{-1}$ ; HRMS (EI-TOF) calcd for  $\text{C}_{37}\text{H}_{31}\text{O}_2\text{PS}$  570.1782, found 570.1785.

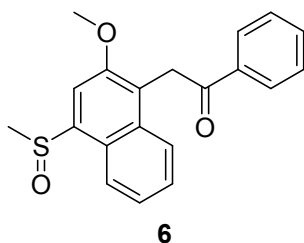

**2-(2-methoxy-4-(methylsulfinyl)naphthalen-1-yl)-1-phenylethanone(6):**

Colorless oil, 152mg, 90% yield;  $^1\text{H}$  NMR (400 MHz,  $\text{CDCl}_3$ )  $\delta$  8.68 (dd,  $J = 6.8, 2.9$  Hz, 1H), 8.15 (s, 1H), 8.06 (d,  $J = 8.6$  Hz, 2H), 7.81 (s, 1H), 7.58 – 7.46 (m, 5H), 4.82 (s, 2H), 3.98 (s, 3H), 3.24 (s, 3H);  $^{13}\text{C}$  NMR (100 MHz,  $\text{CDCl}_3$ )  $\delta$  195.48, 144.76, 139.95, 134.89, 134.55, 129.74, 129.06, 127.70, 126.11, 124.46, 124.31, 124.28, 123.80, 116.10, 56.75, 44.40, 35.96; IR (neat) 3417, 1622,  $1191\text{cm}^{-1}$ ; HRMS (EI-TOF) calcd for  $\text{C}_{20}\text{H}_{18}\text{O}_3\text{S}$  338.0977, found 338.0974.

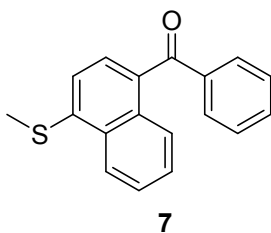

**(4-(methylthio)naphthalen-1-yl)(phenyl)methanone(7):** Colorless oil, 90mg, 65% yield;  $^1\text{H}$  NMR (400 MHz,  $\text{CDCl}_3$ )  $\delta$  8.32 – 8.27 (m, 1H), 8.23 – 8.18 (m, 1H),

7.87 – 7.80 (m, 2H), 7.60 – 7.51 (m, 4H), 7.45 (t,  $J = 7.7$  Hz, 2H), 7.29 (d,  $J = 7.7$  Hz, 1H), 2.63 (s, 3H);  $^{13}\text{C}$  NMR (100 MHz,  $\text{CDCl}_3$ )  $\delta$  197.59, 141.23, 138.64, 133.00, 132.82, 131.15, 130.98, 130.35, 128.37, 127.64, 126.52, 126.41, 124.11, 119.58, 15.28; IR (neat) 3417, 1620, 1192  $\text{cm}^{-1}$ ; HRMS (EI-TOF) calcd for  $\text{C}_{18}\text{H}_{14}\text{OS}$  278.0765, found 278.0763.

## 5. The $^1\text{H}$ and $^{13}\text{C}$ NMR spectra of compounds

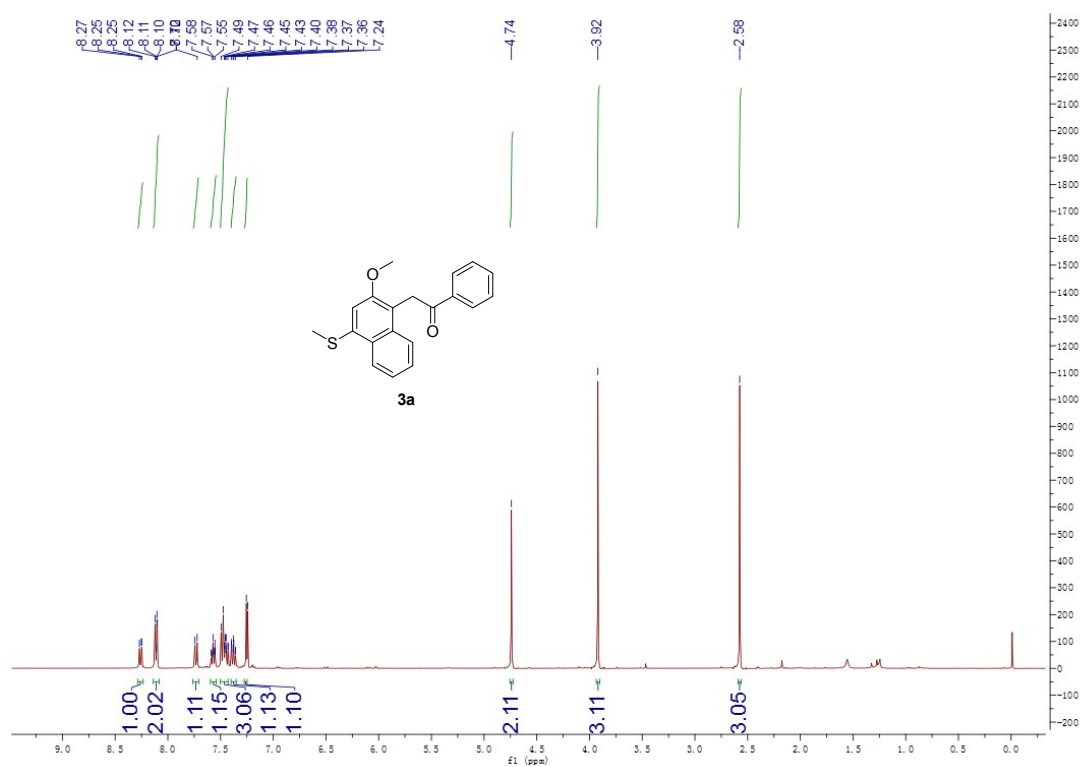

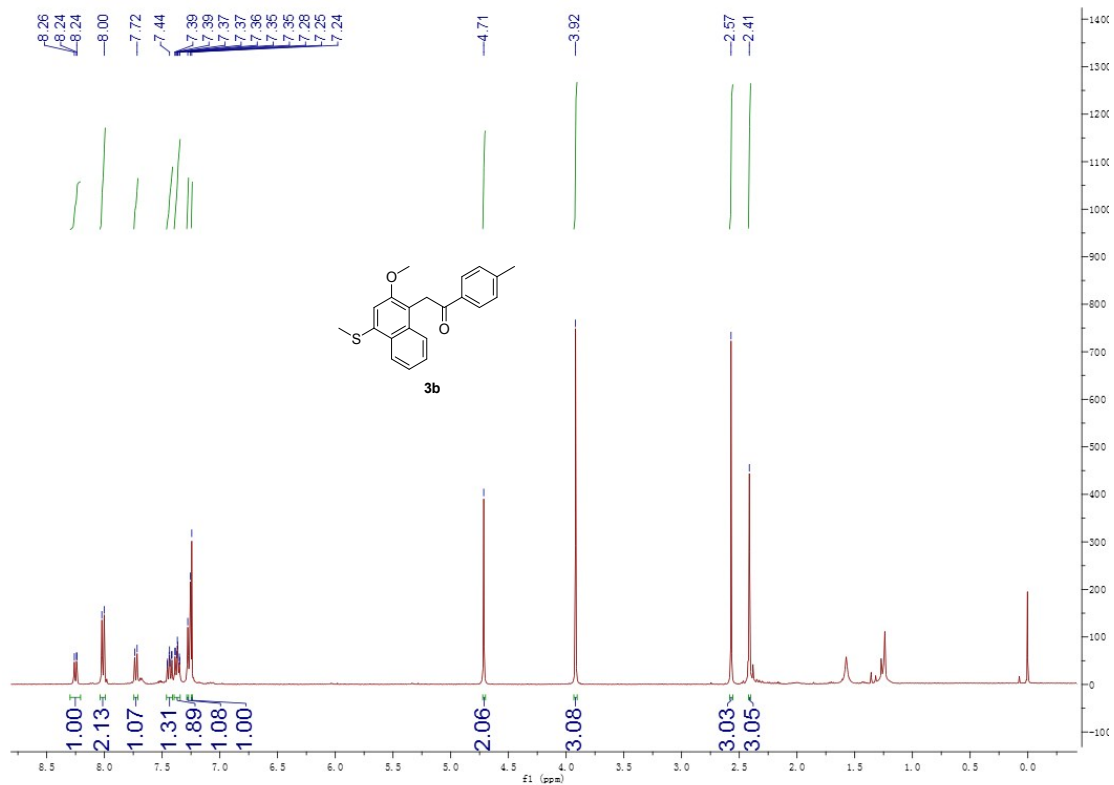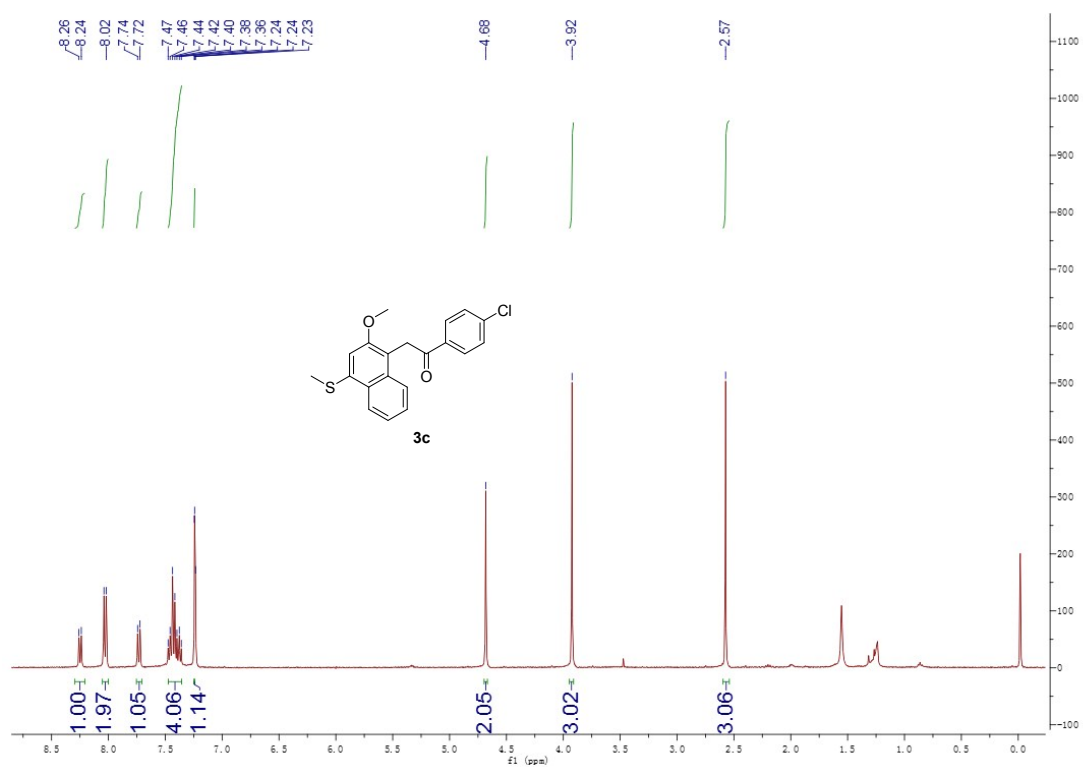

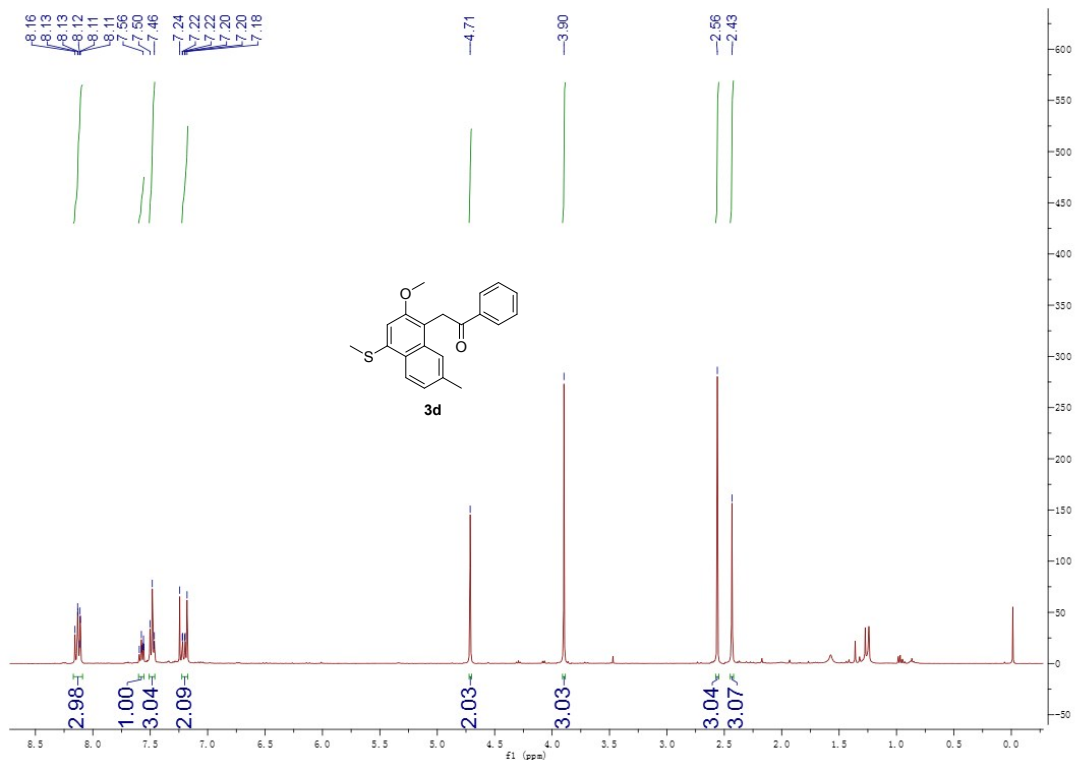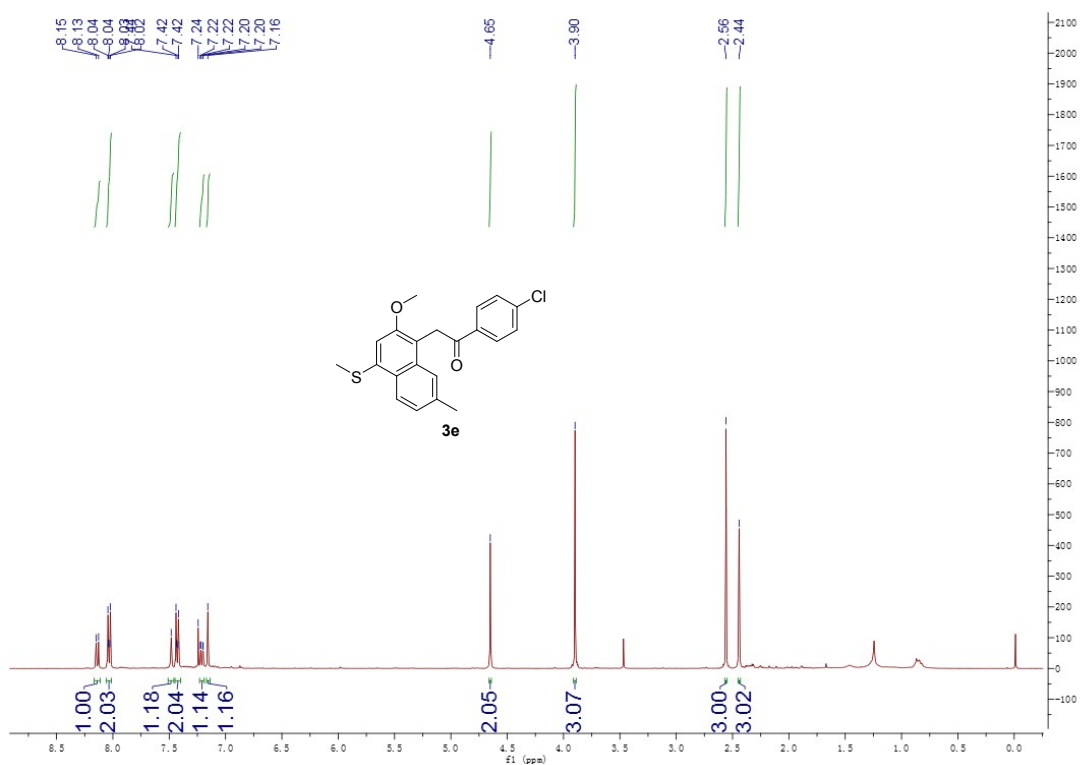

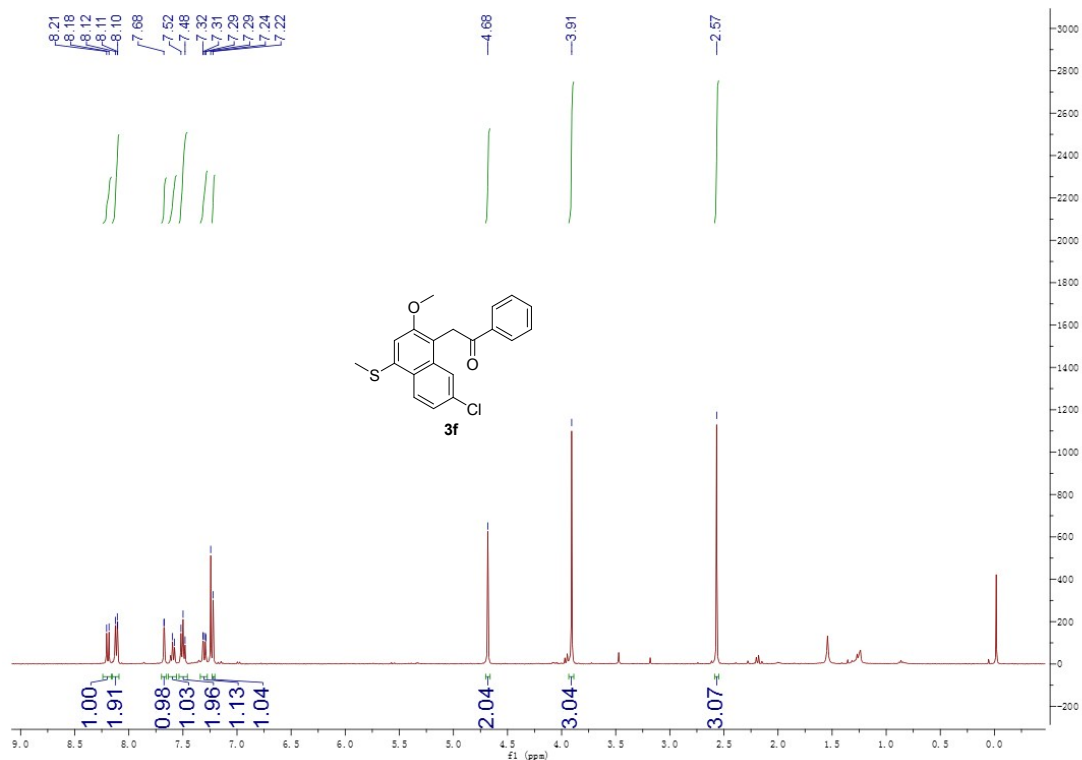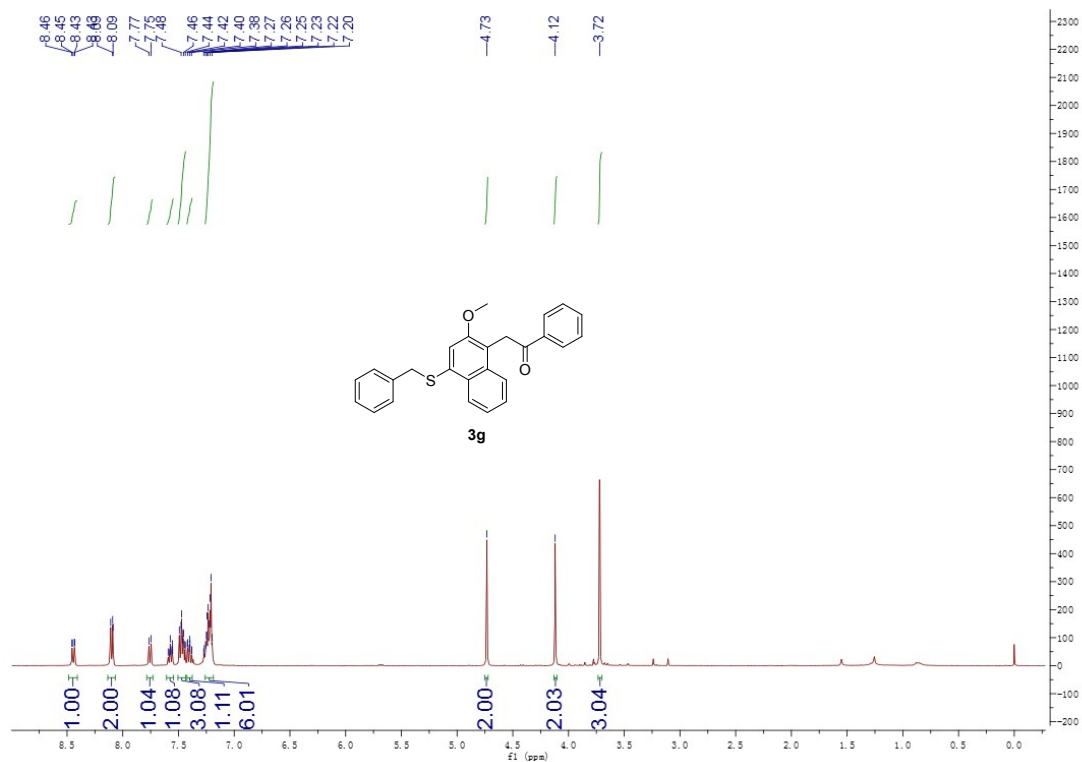

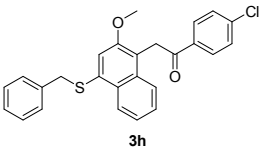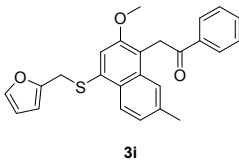

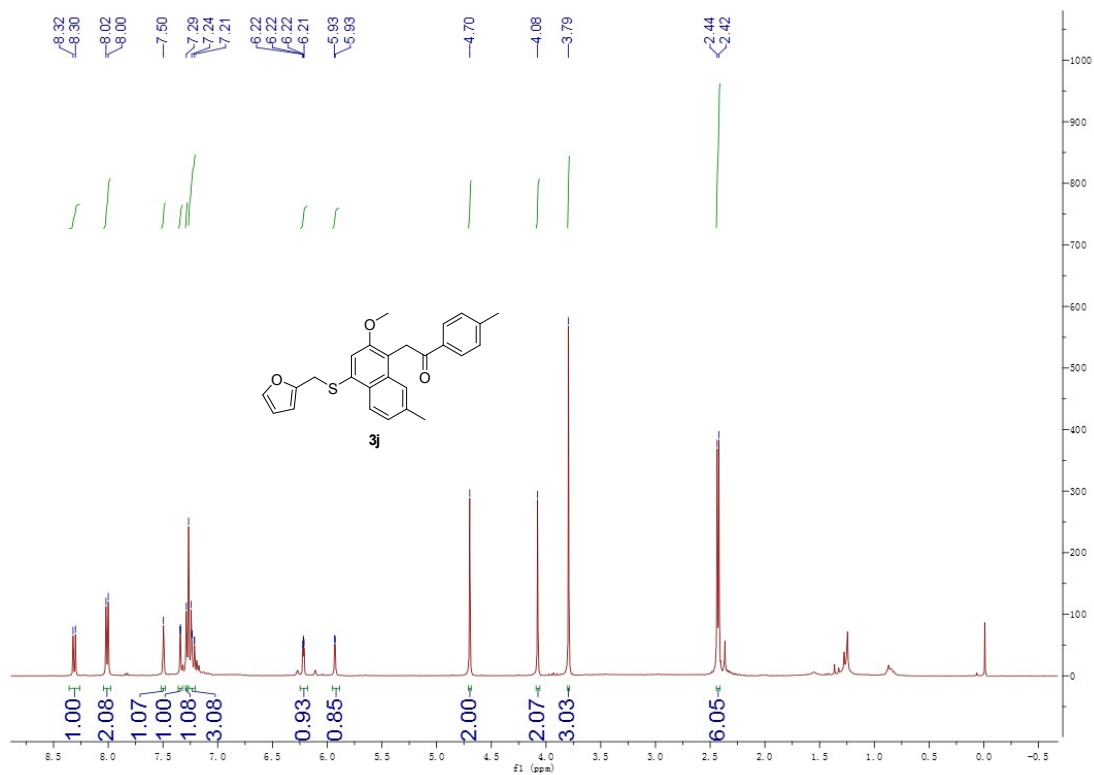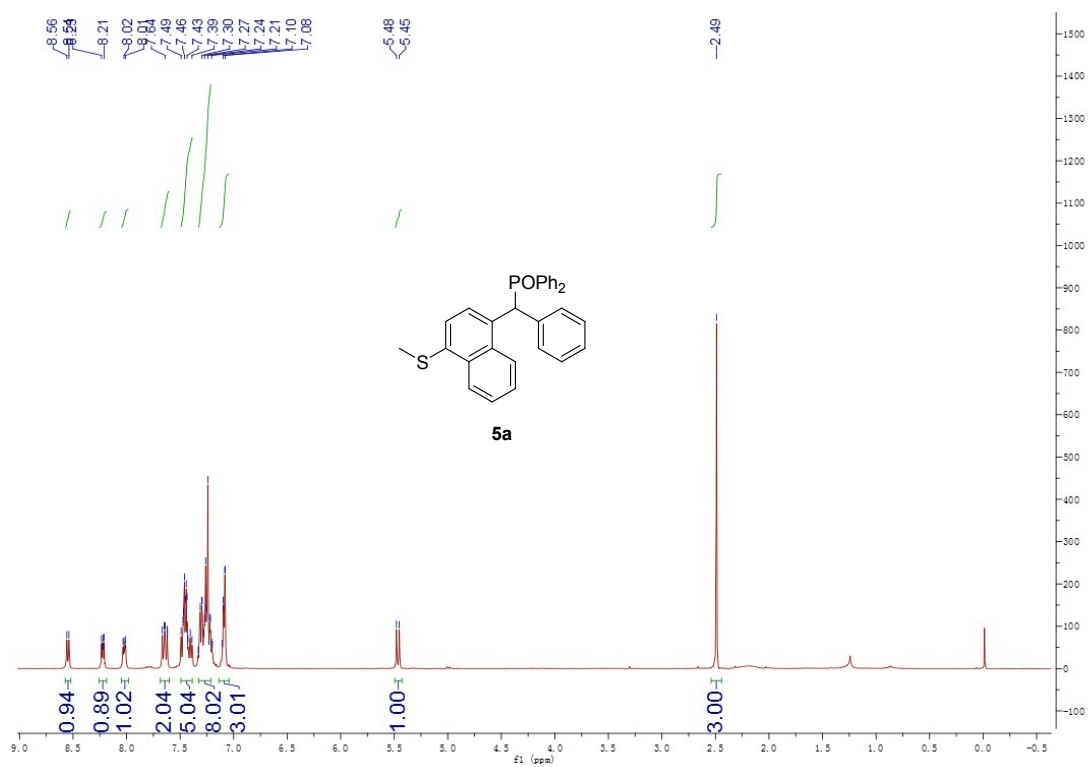



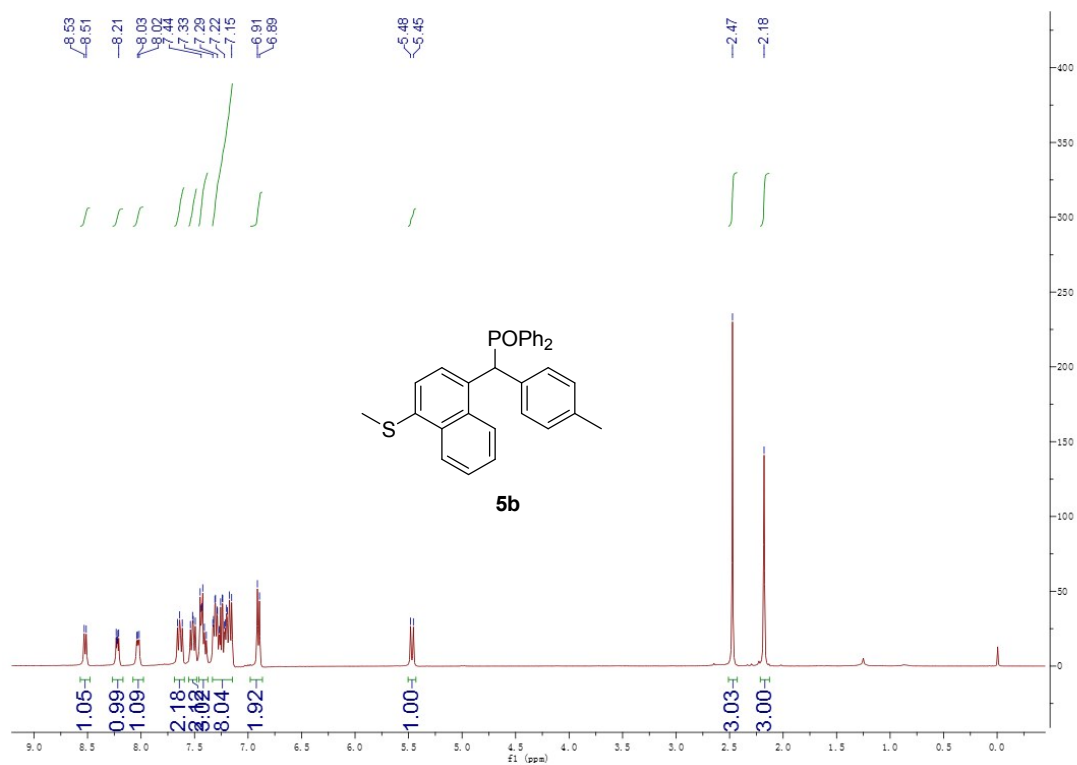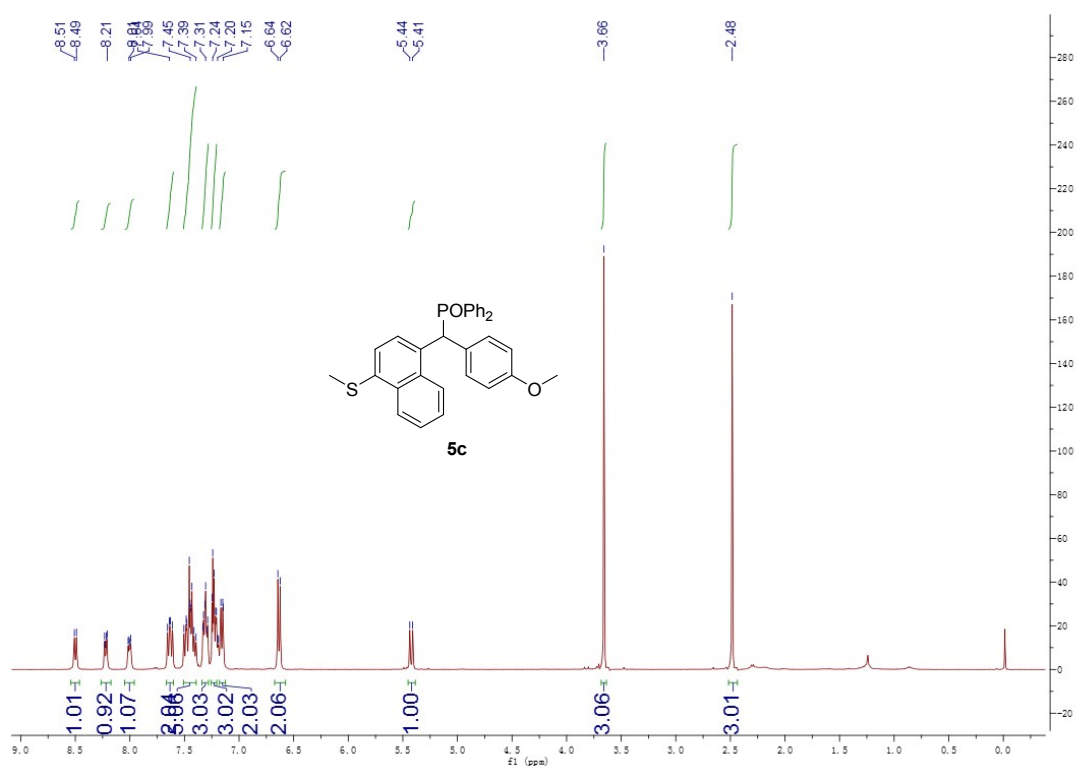

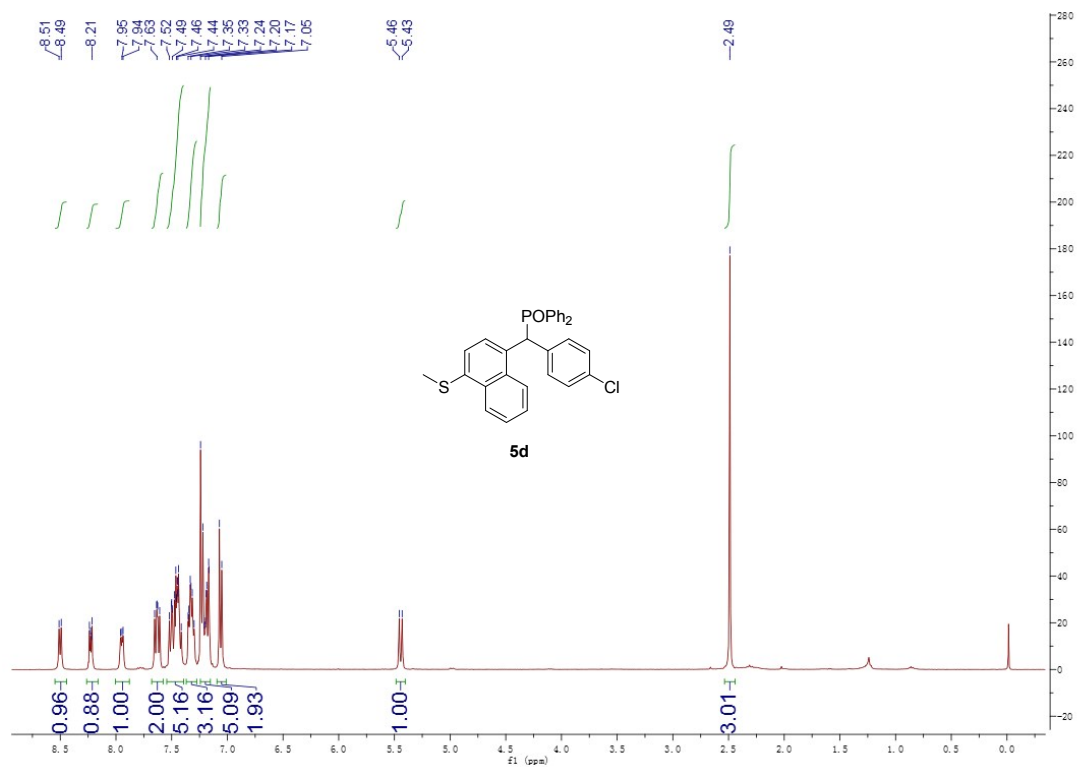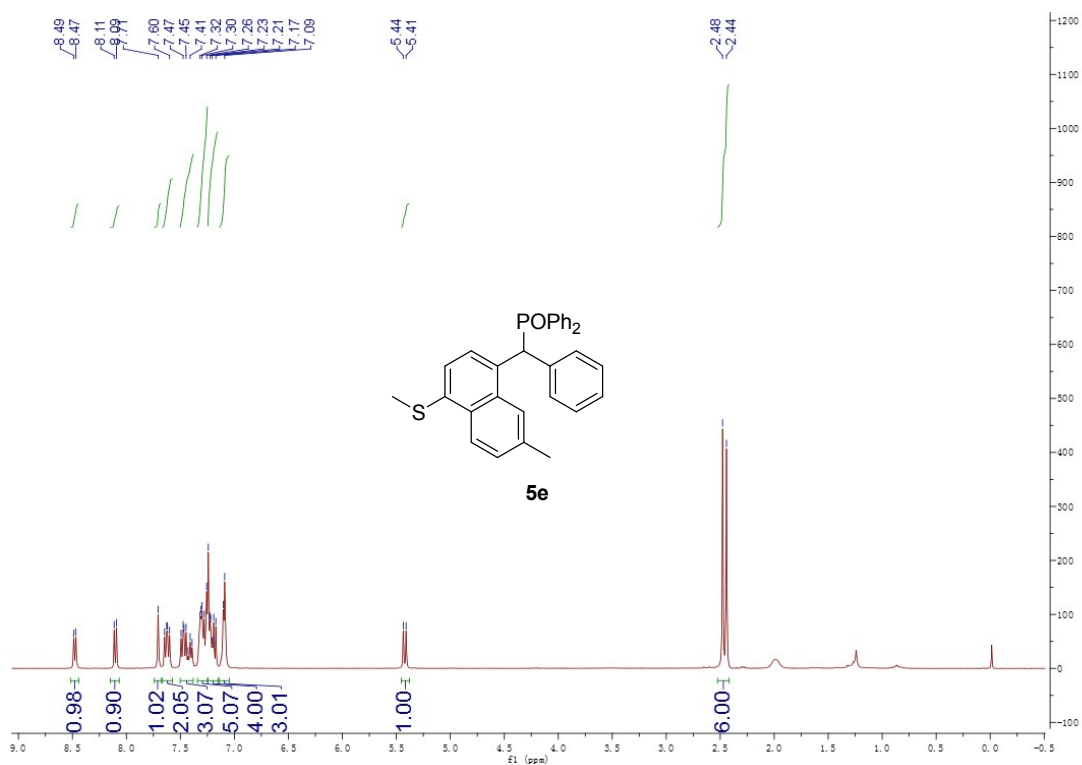

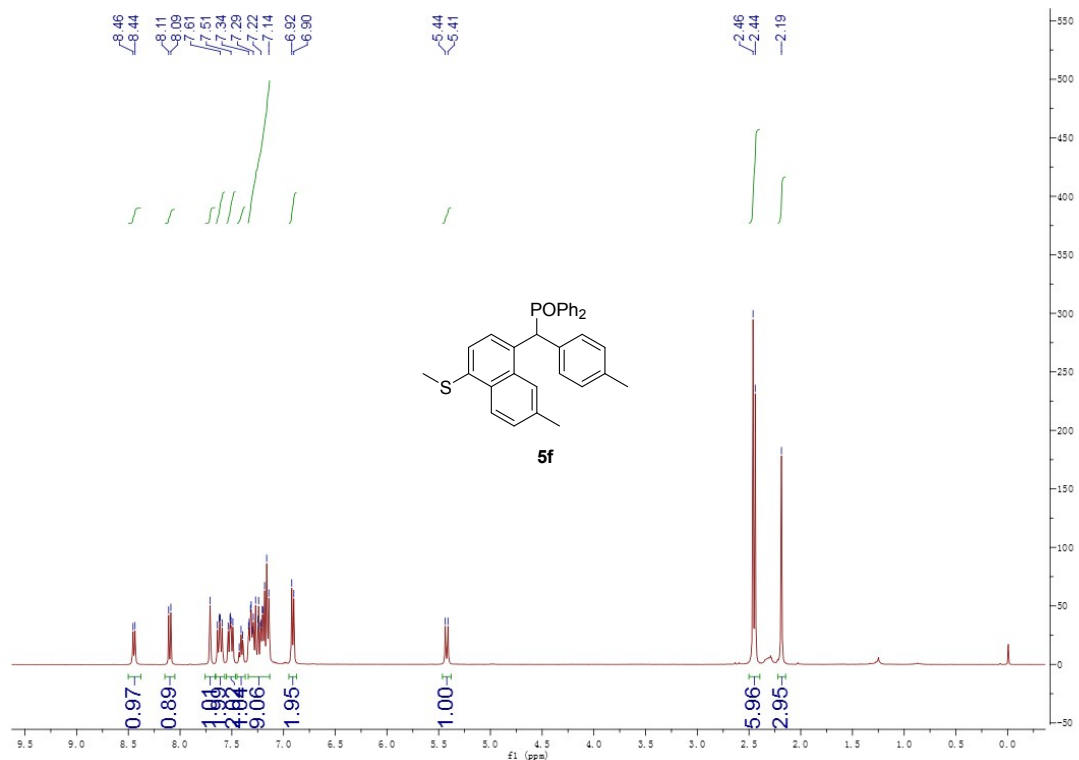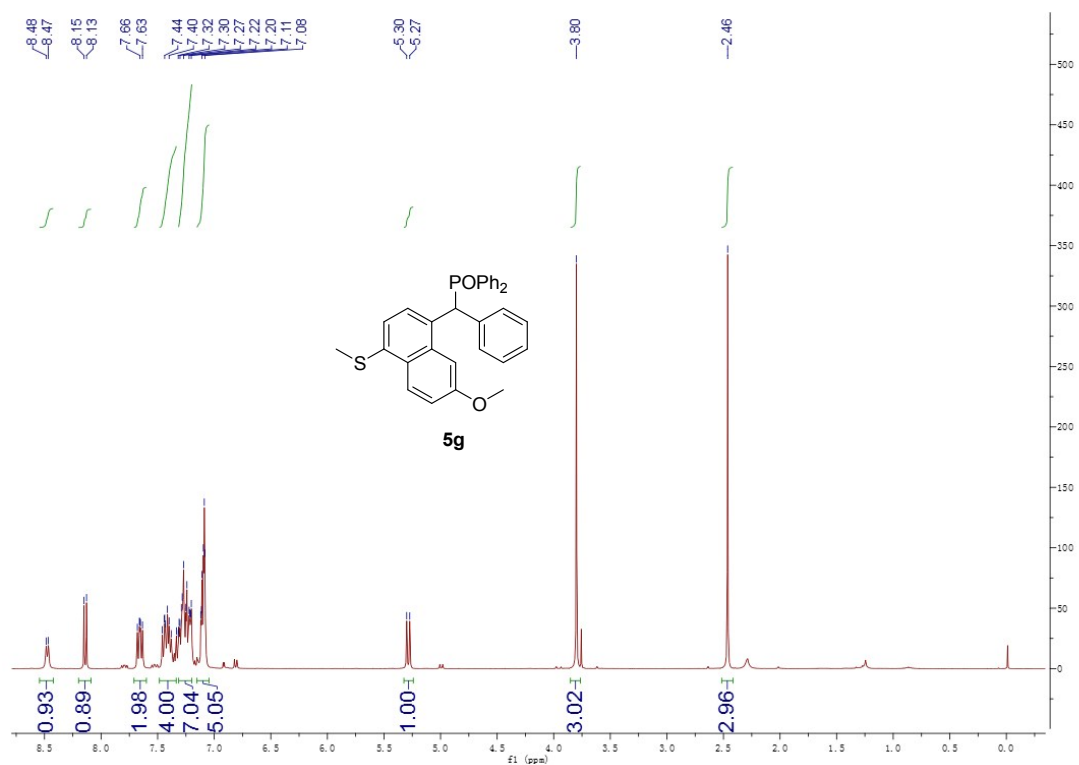

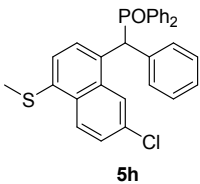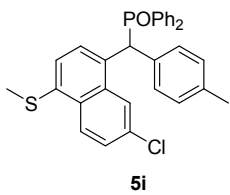

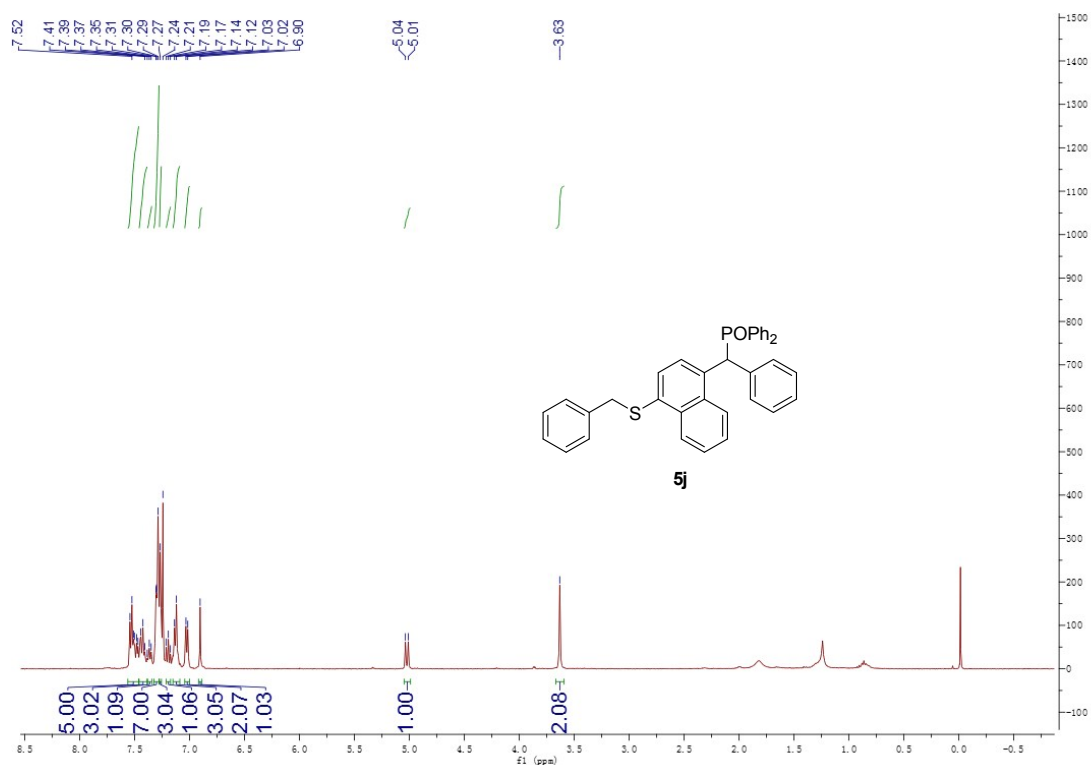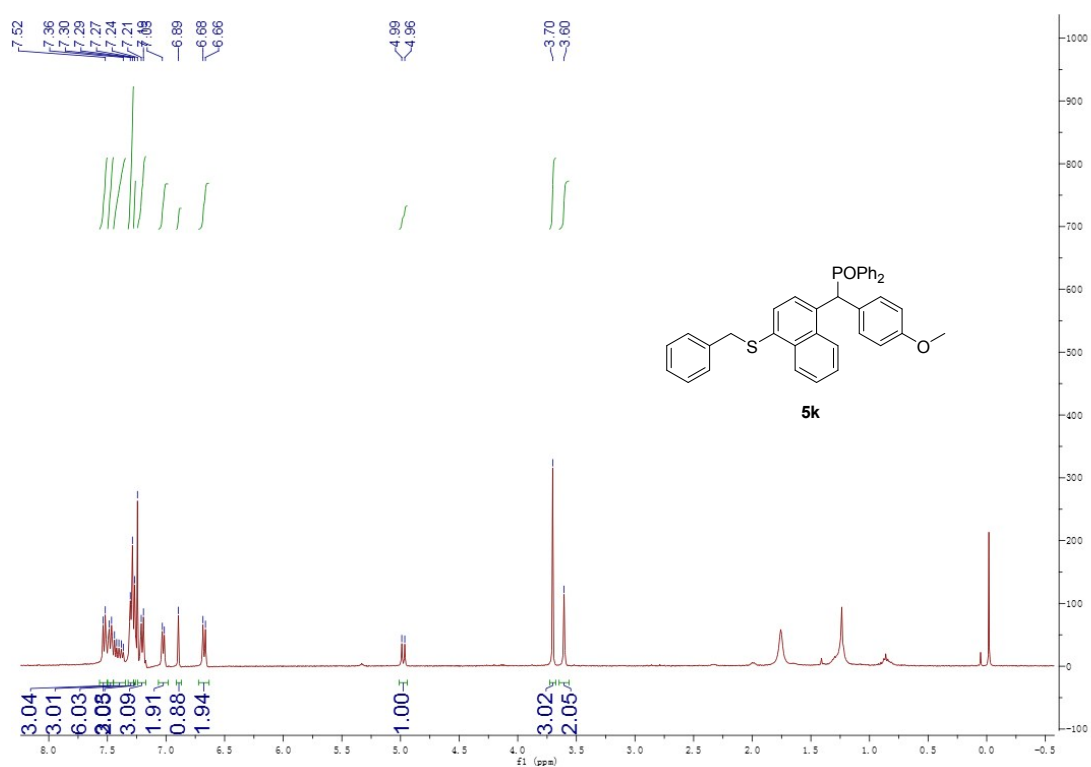

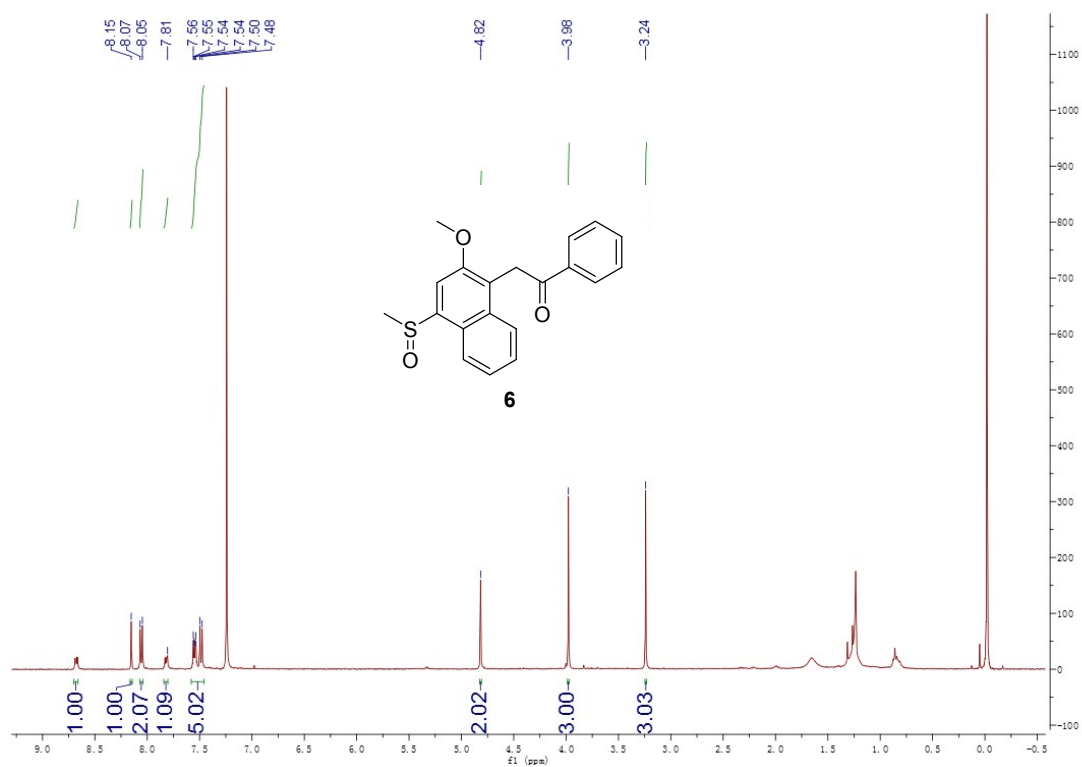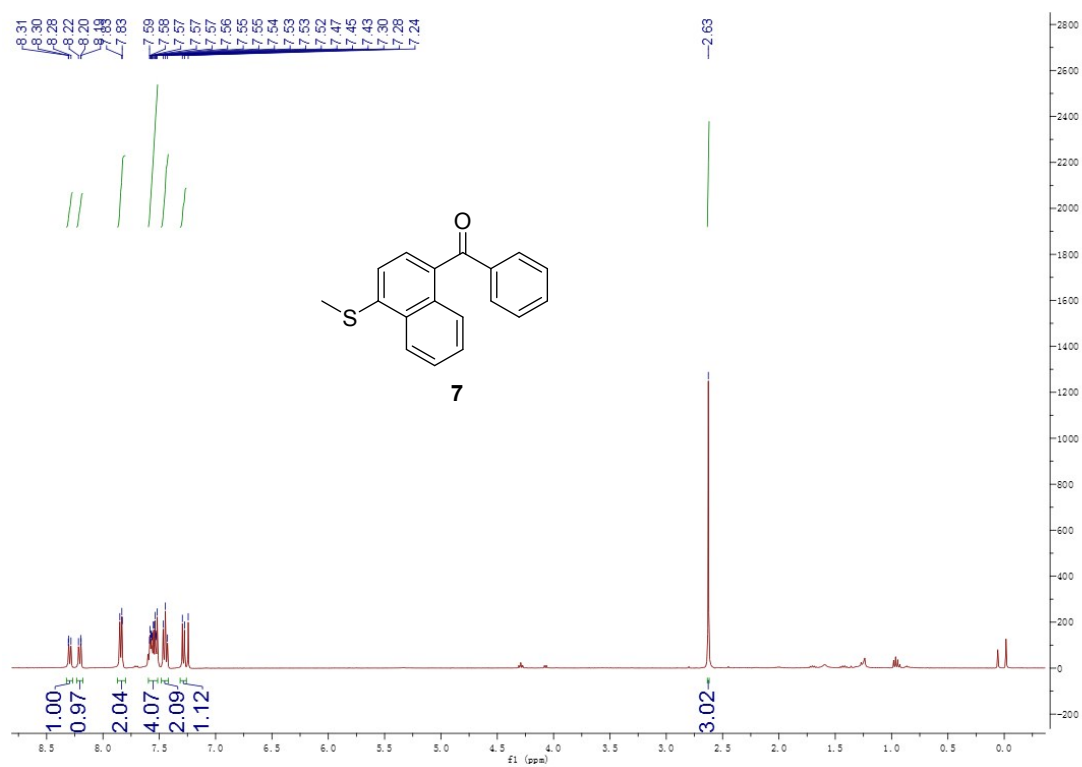

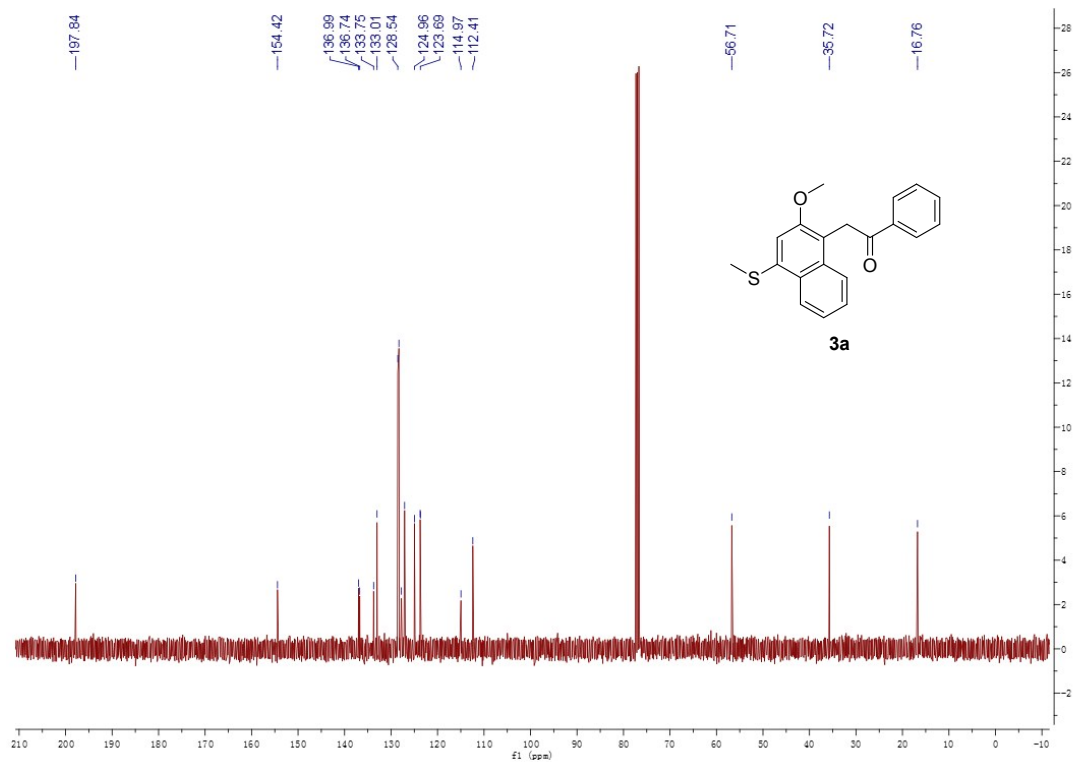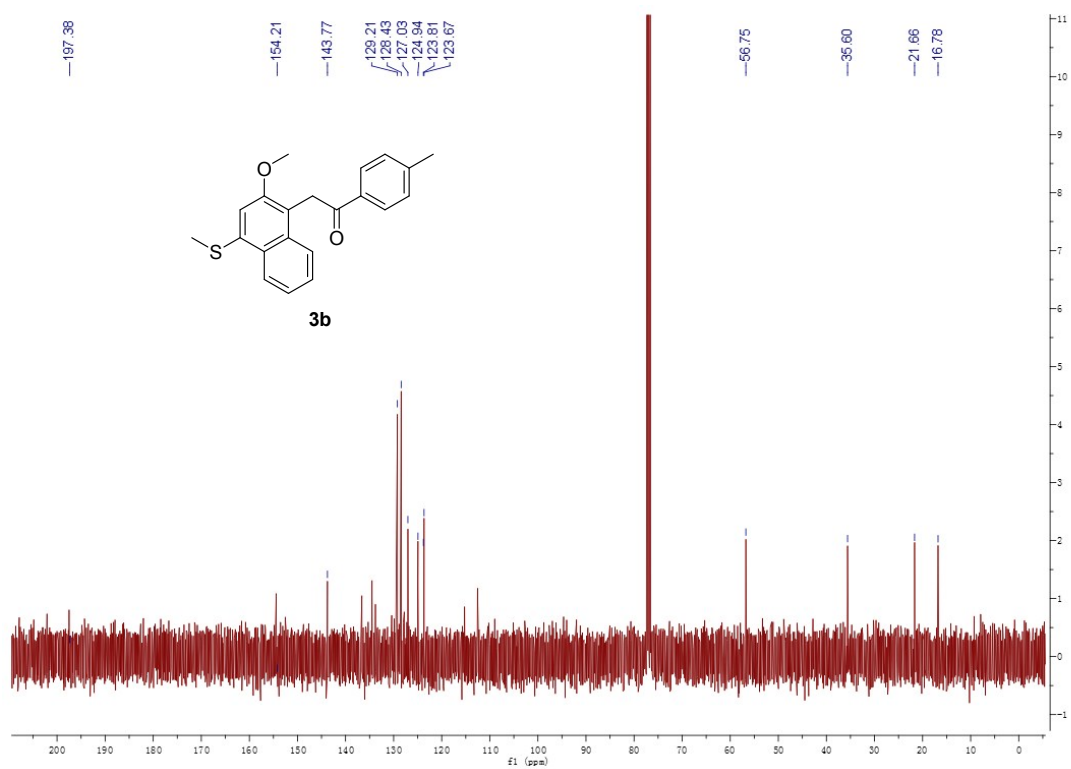

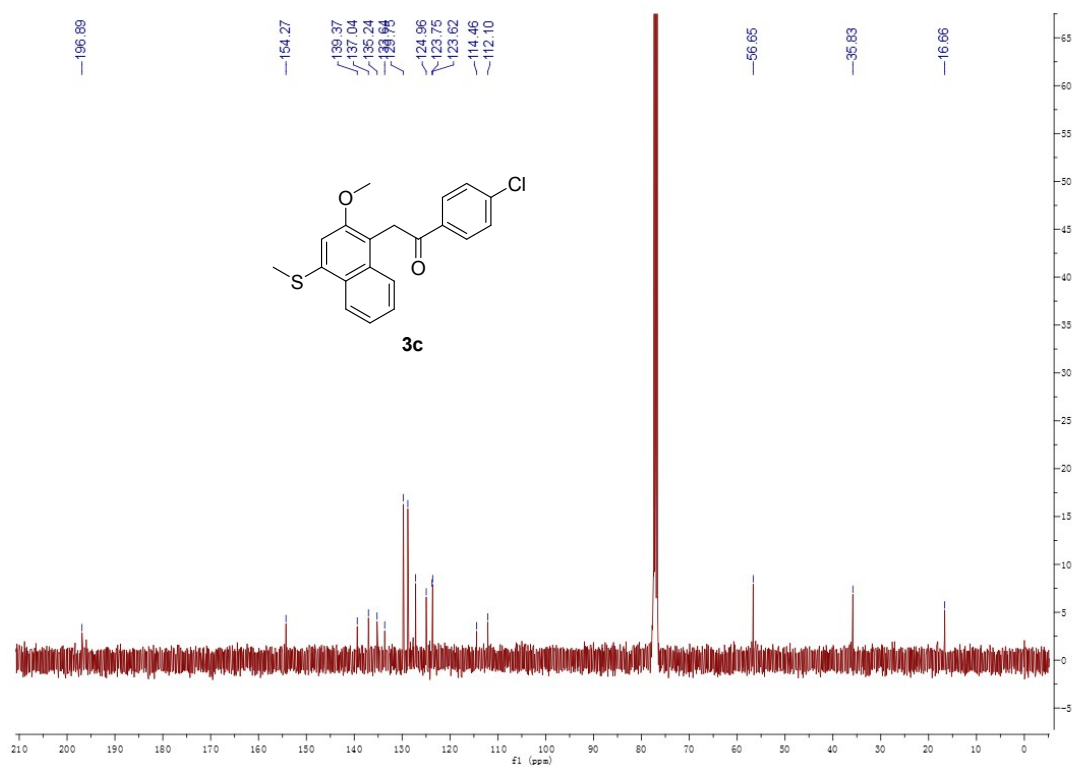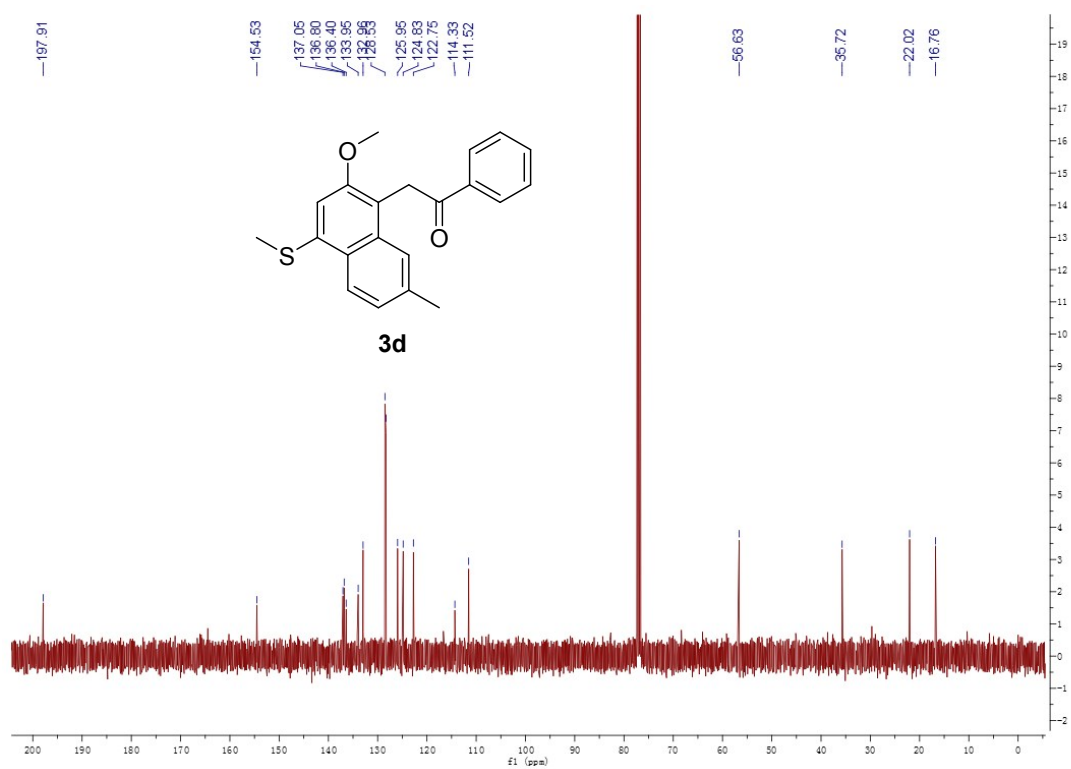



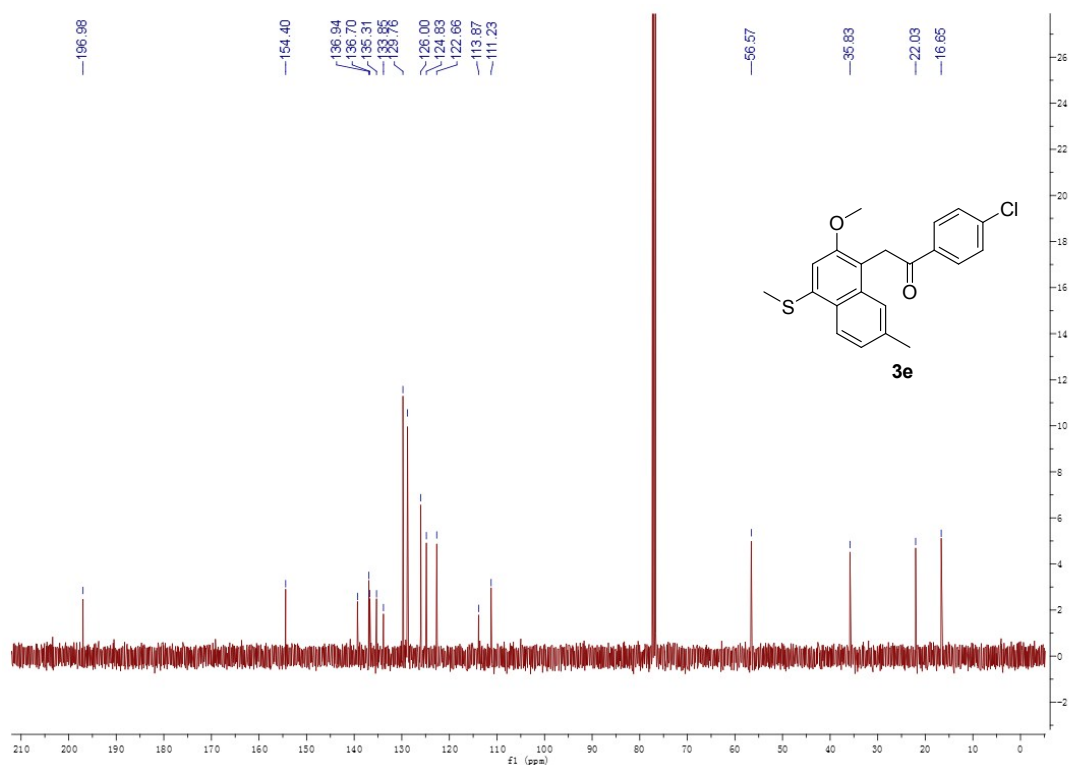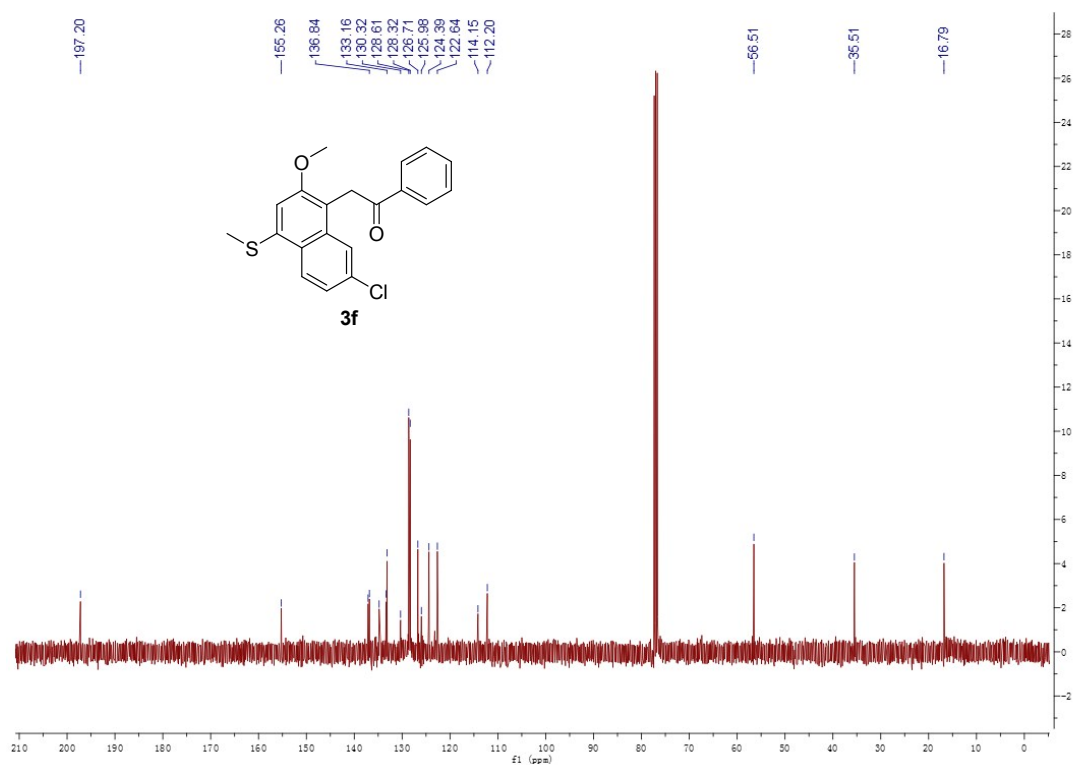

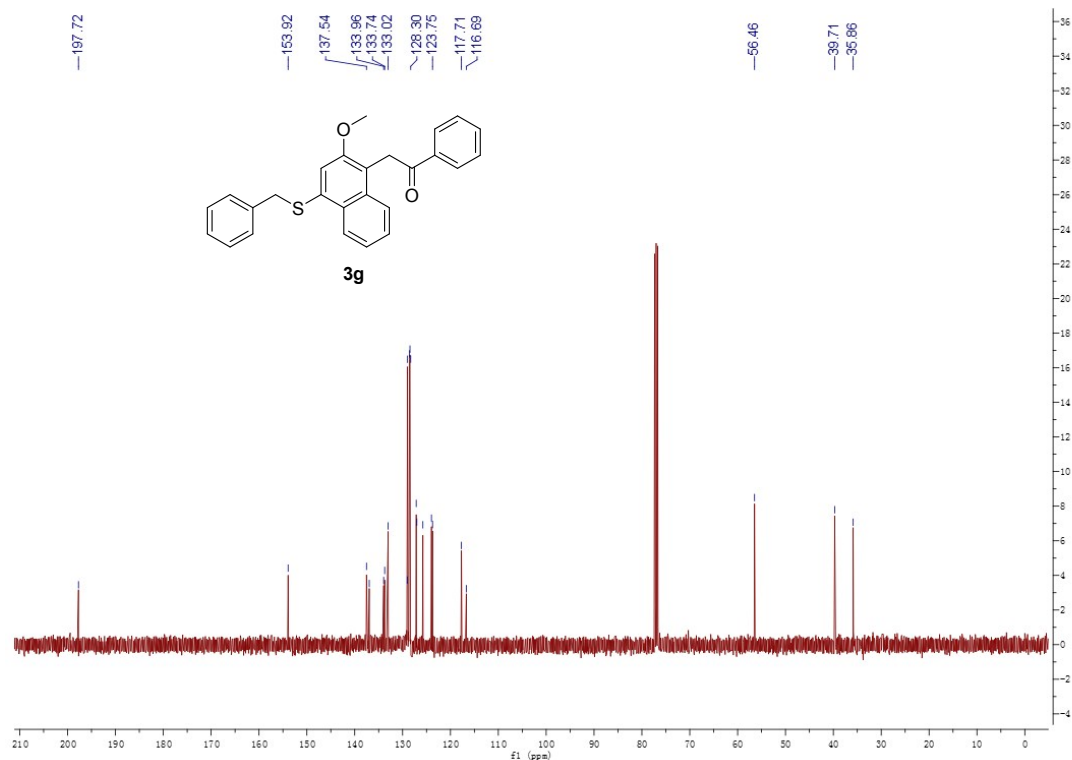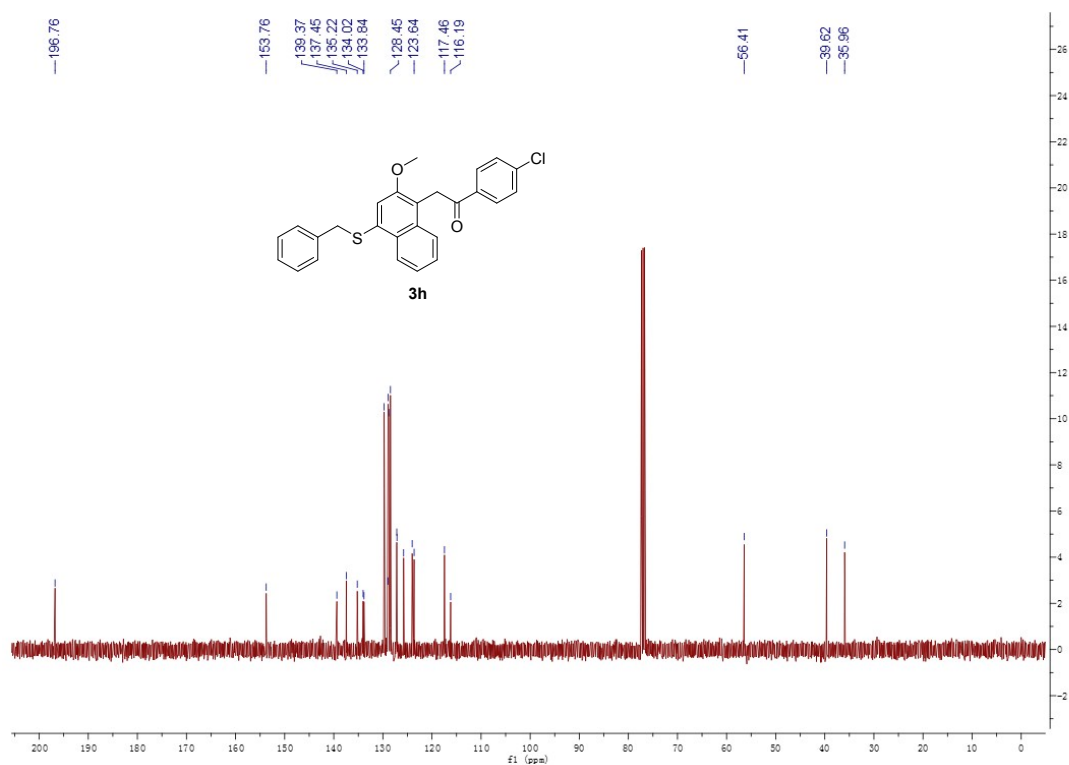

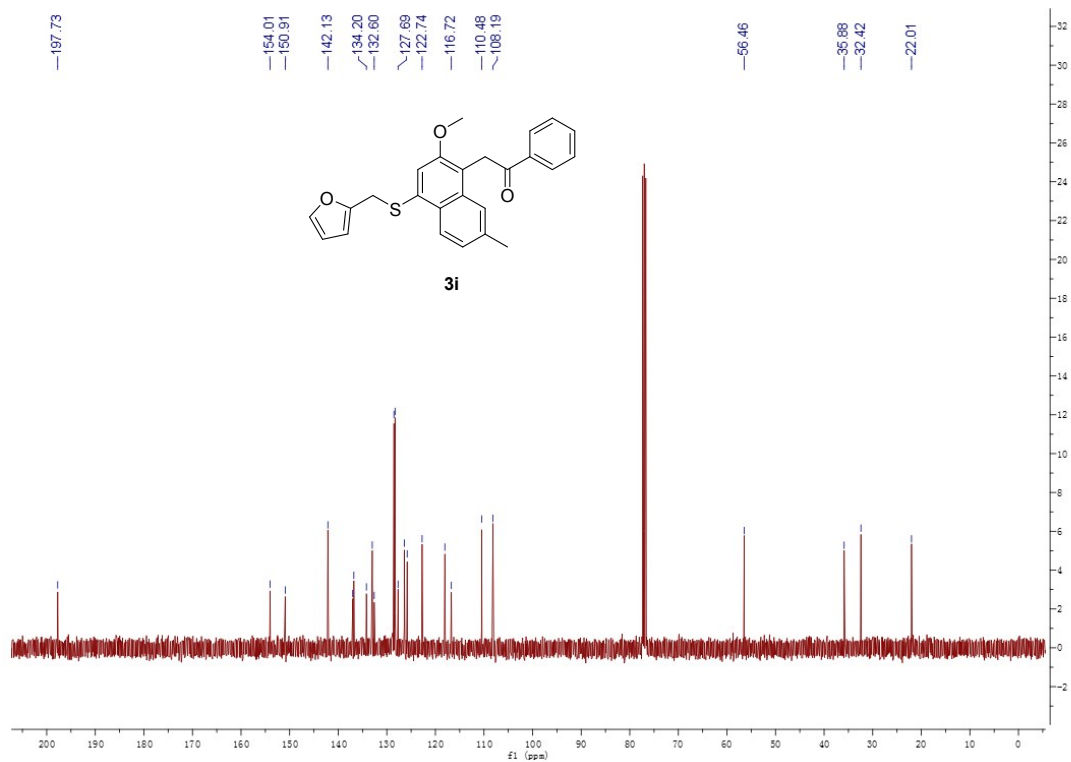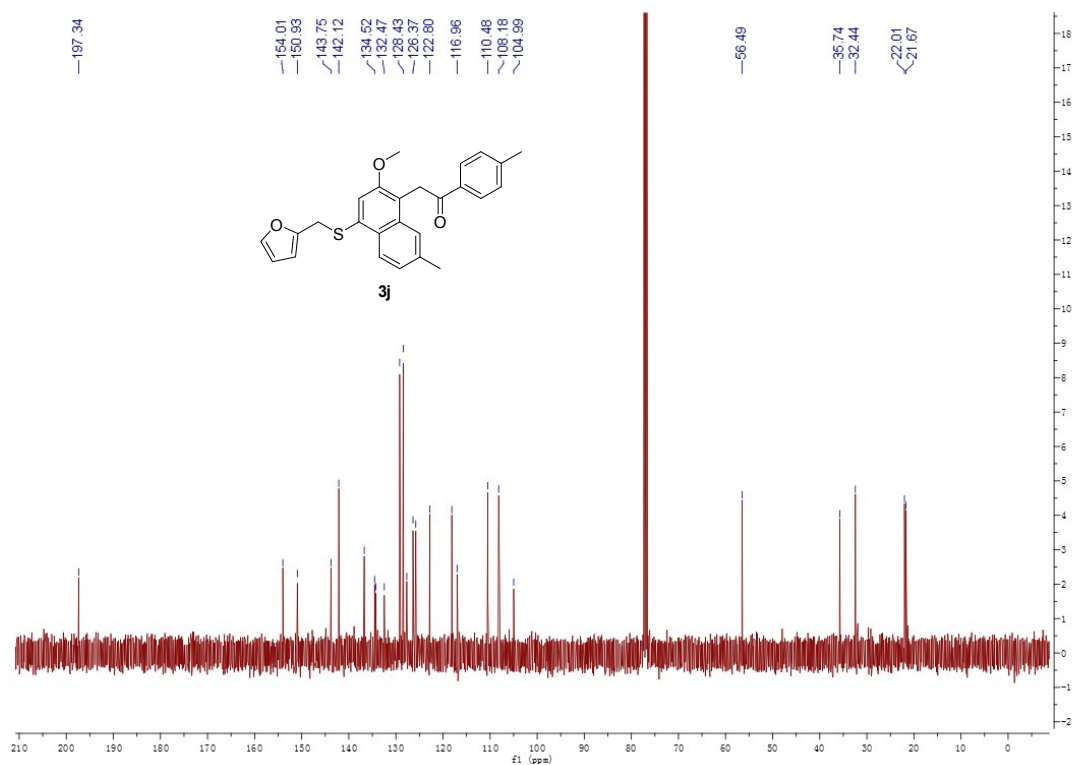

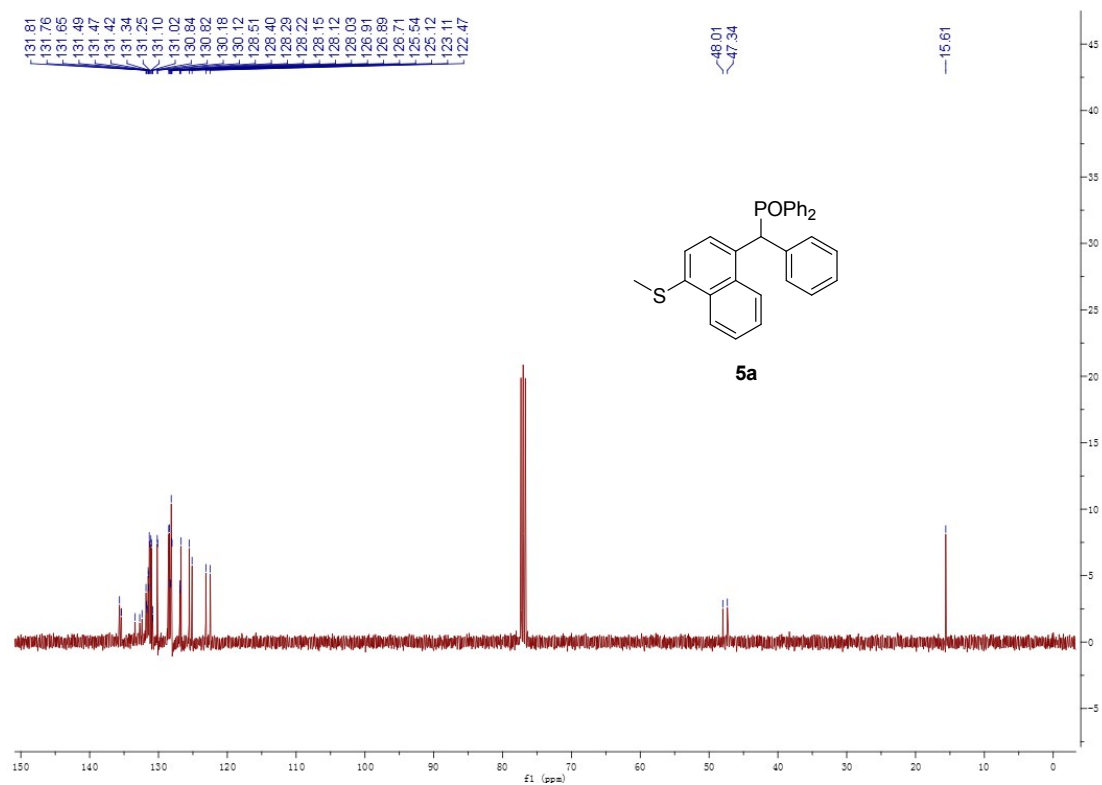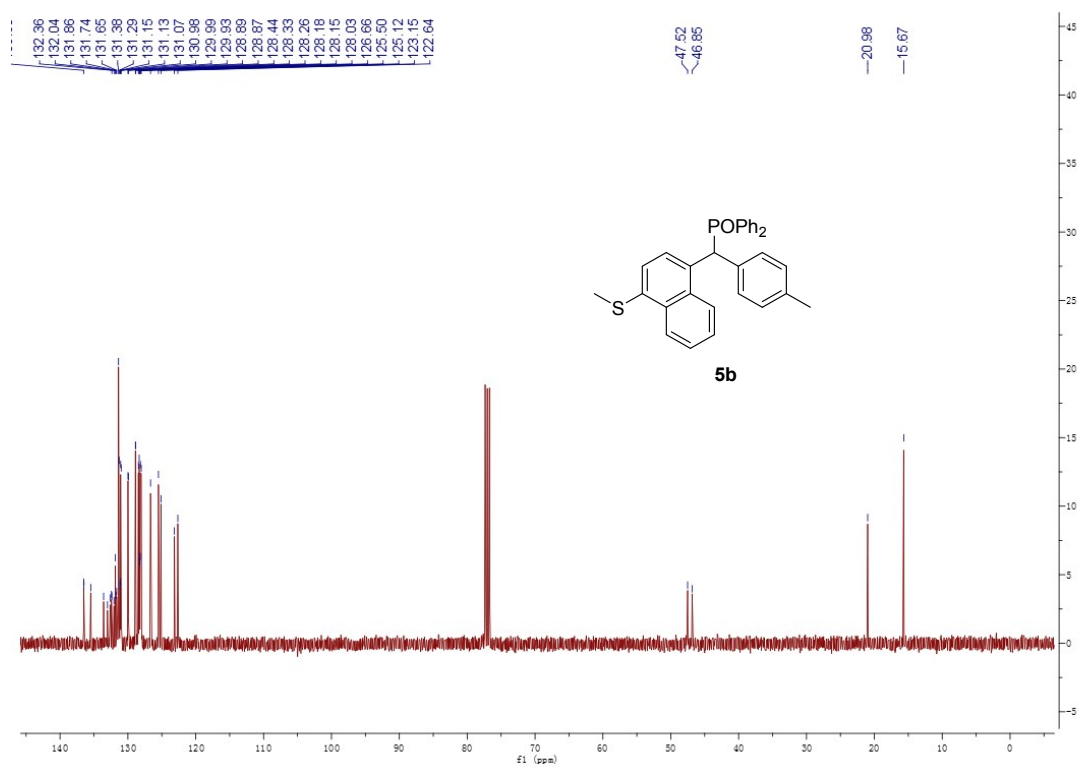

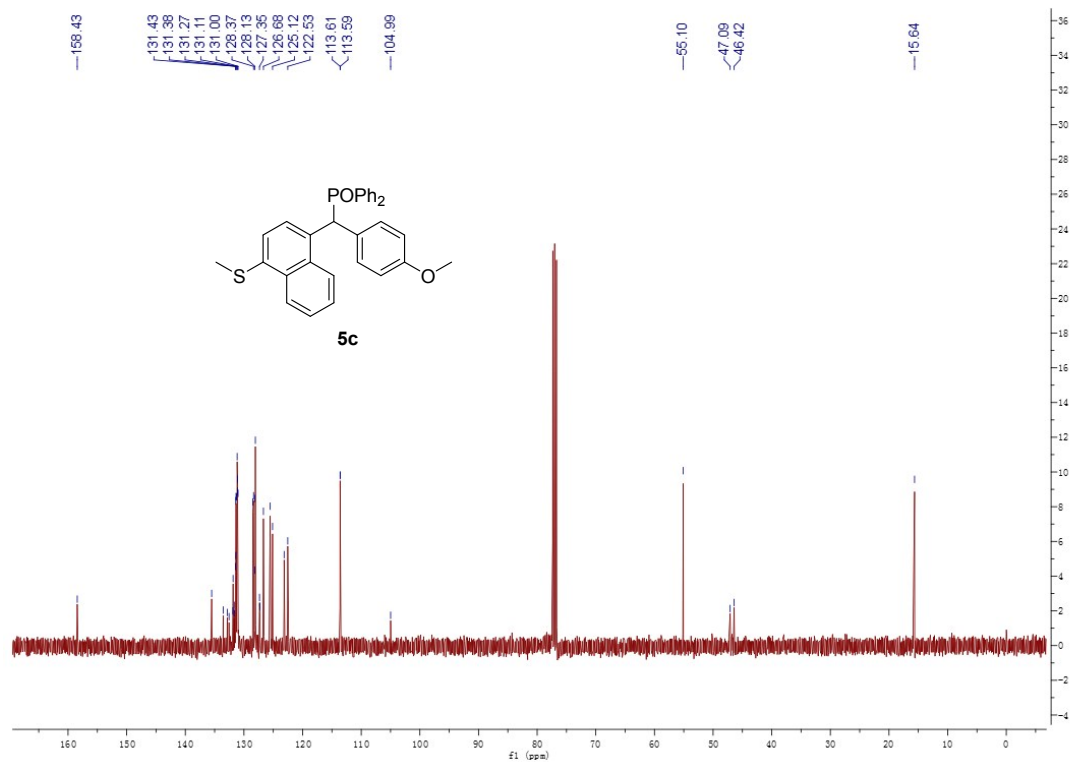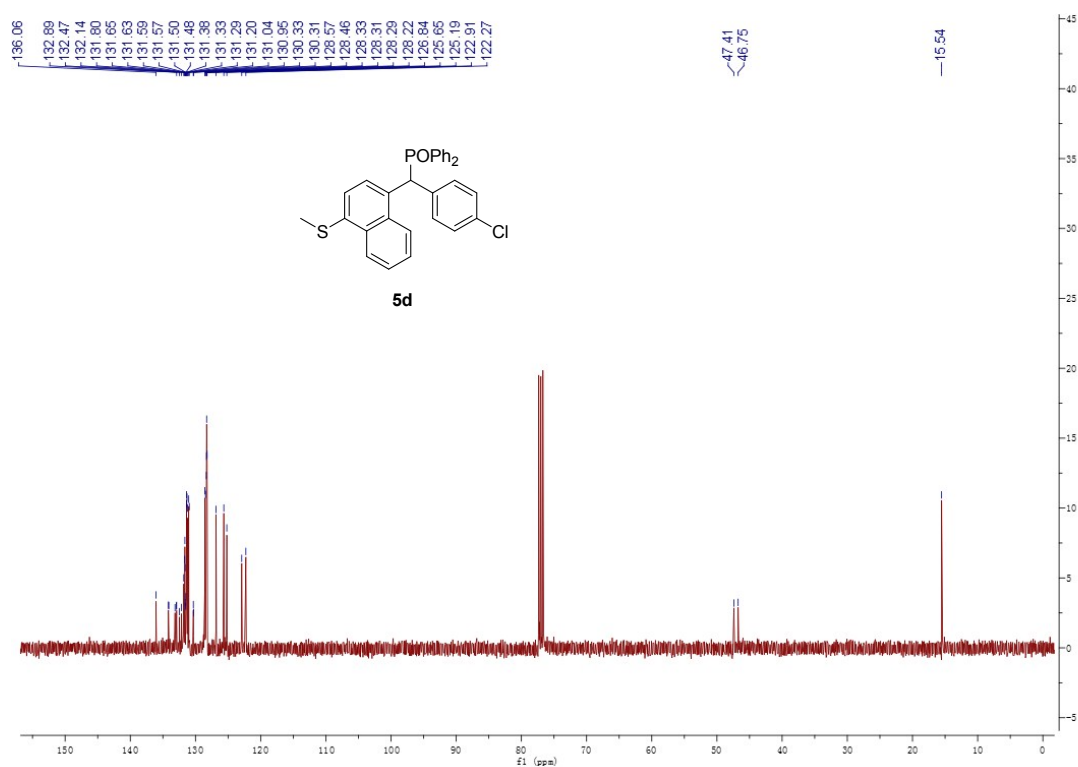

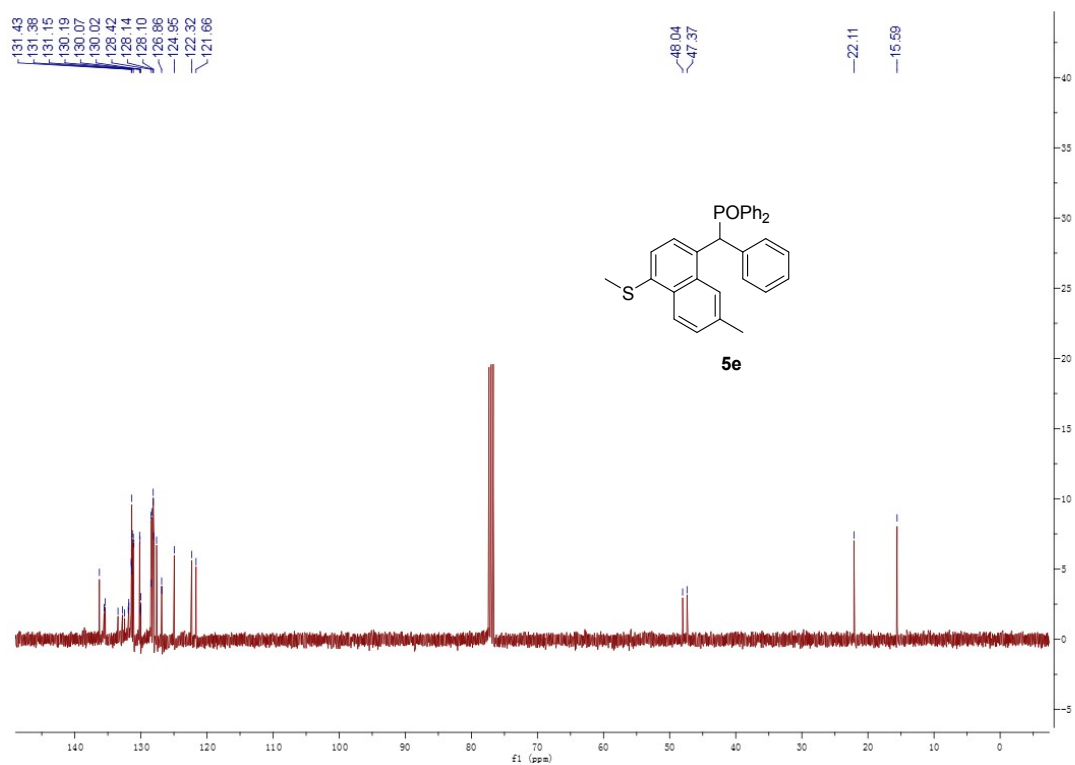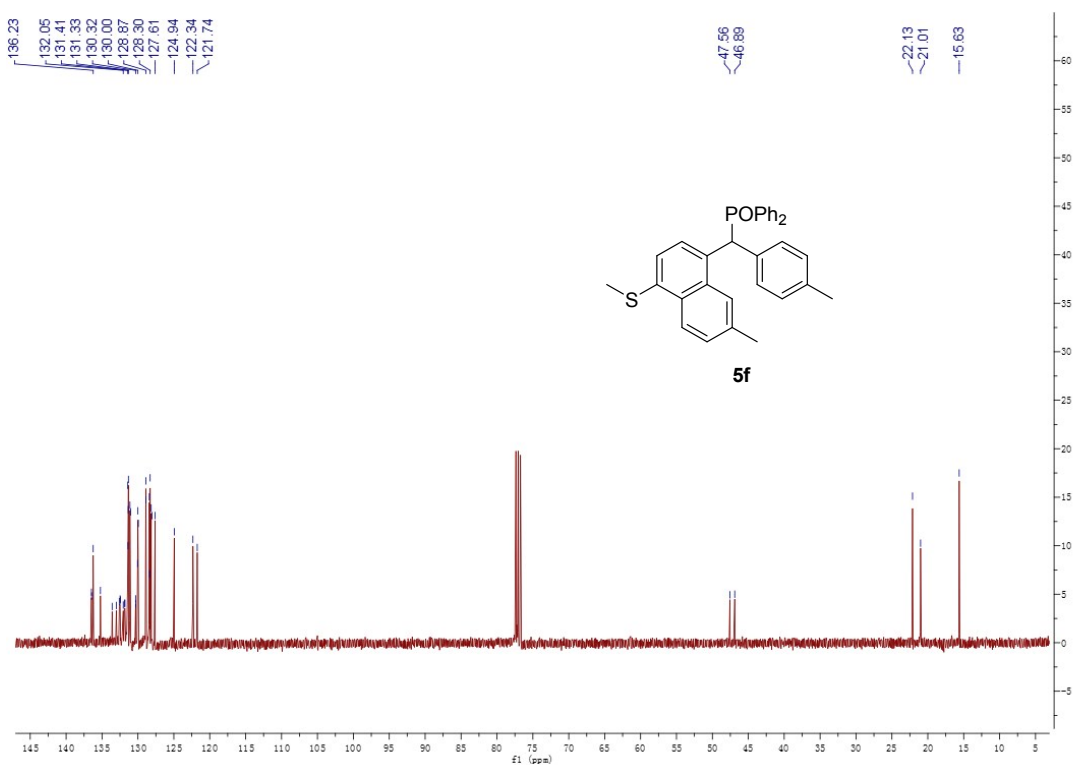

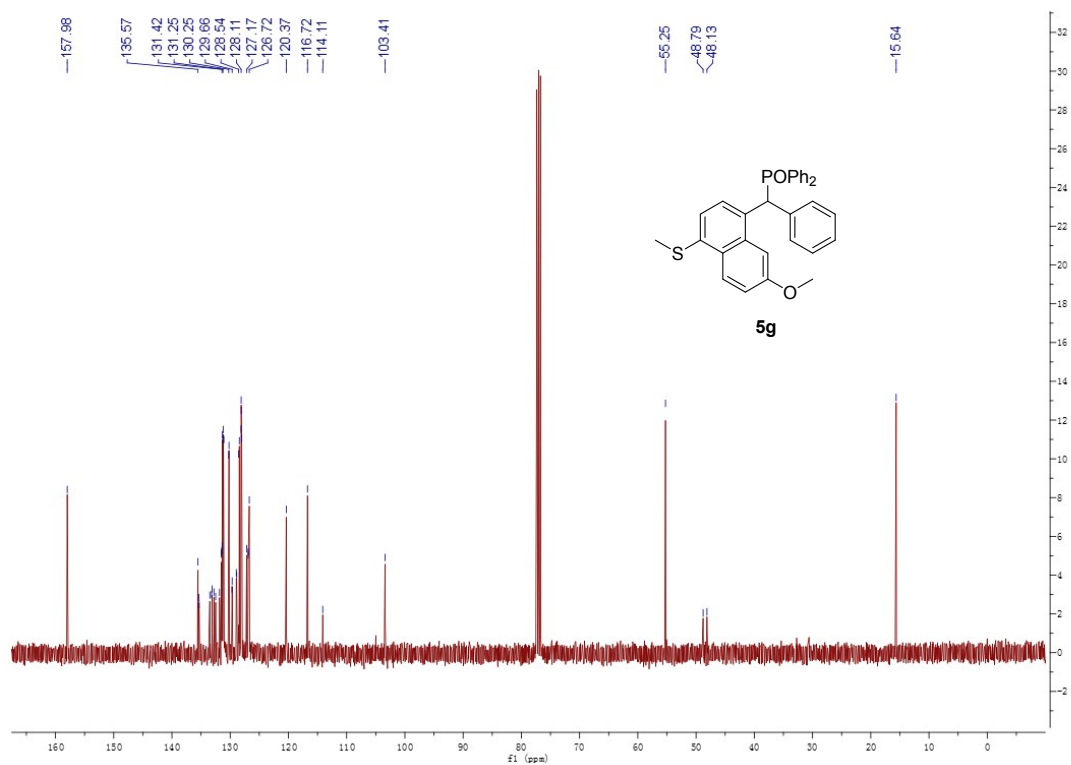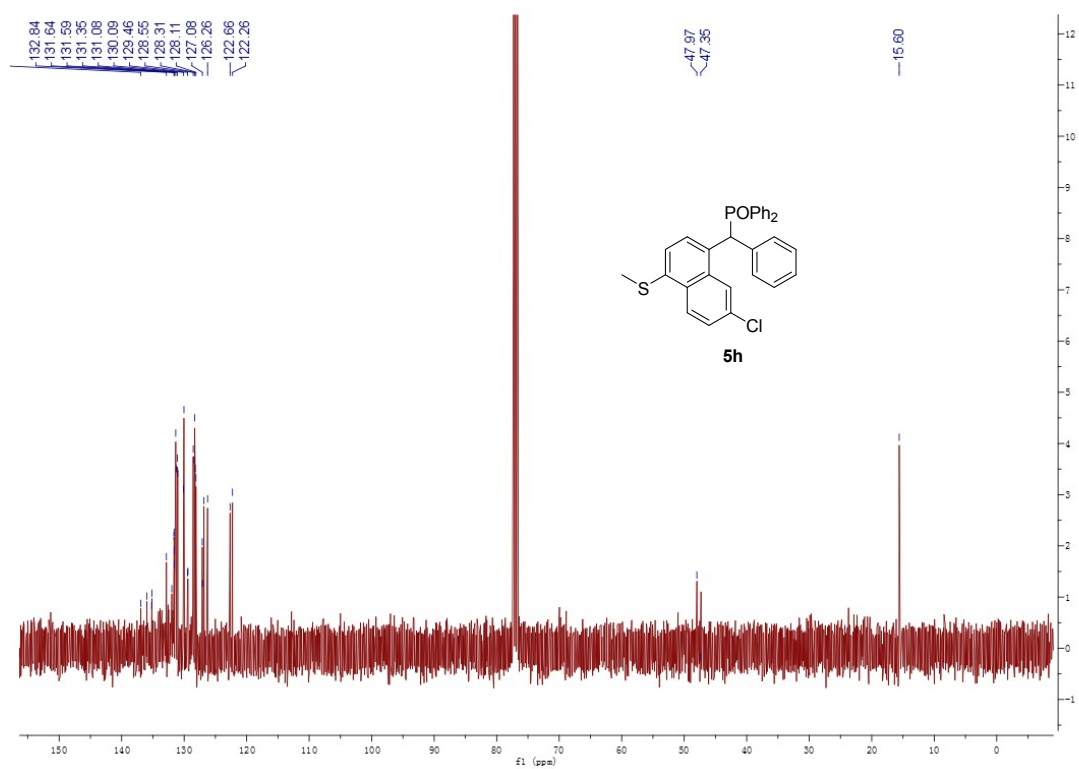

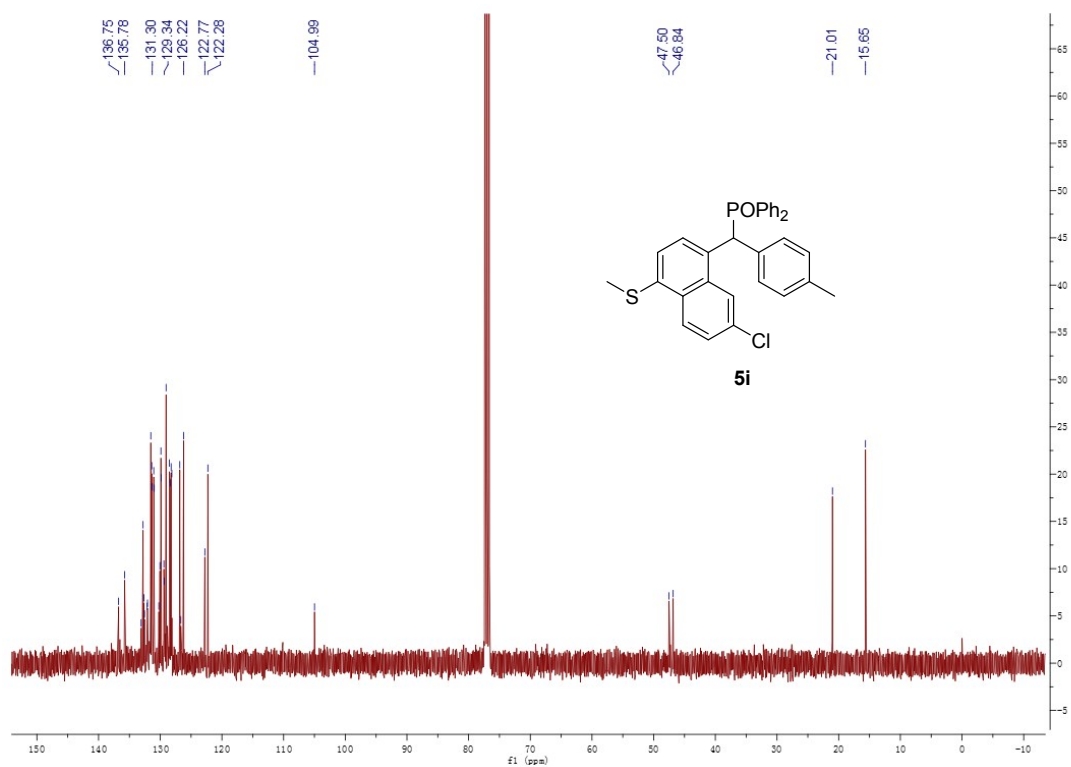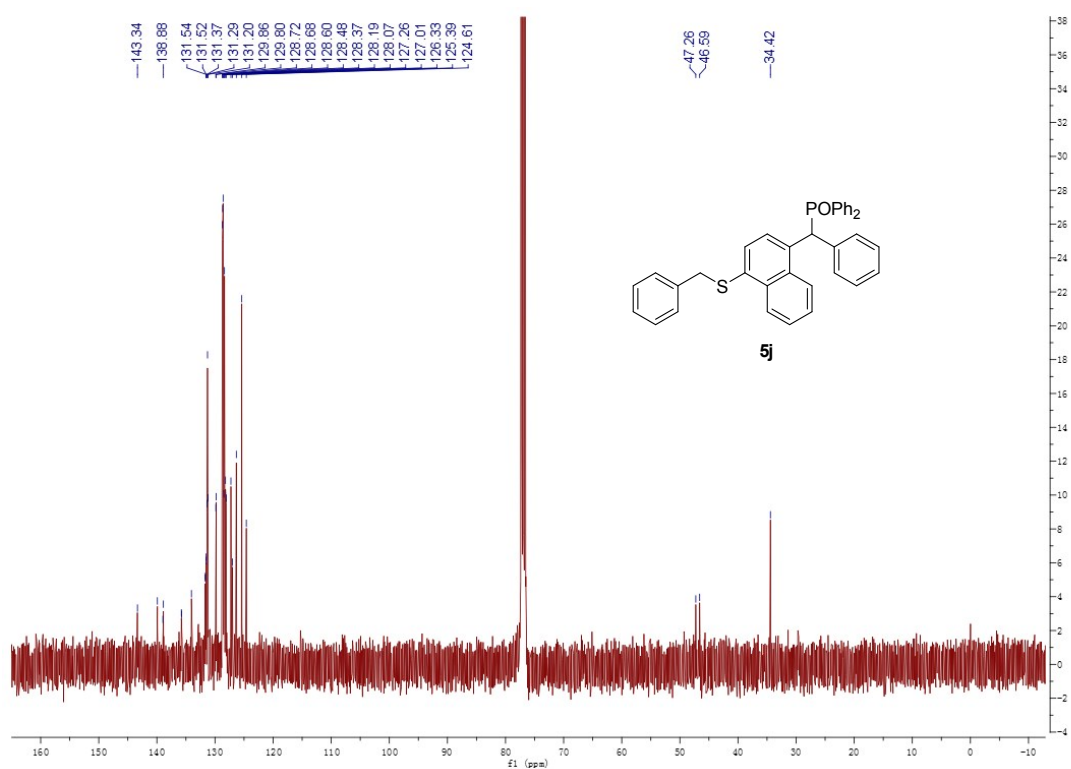



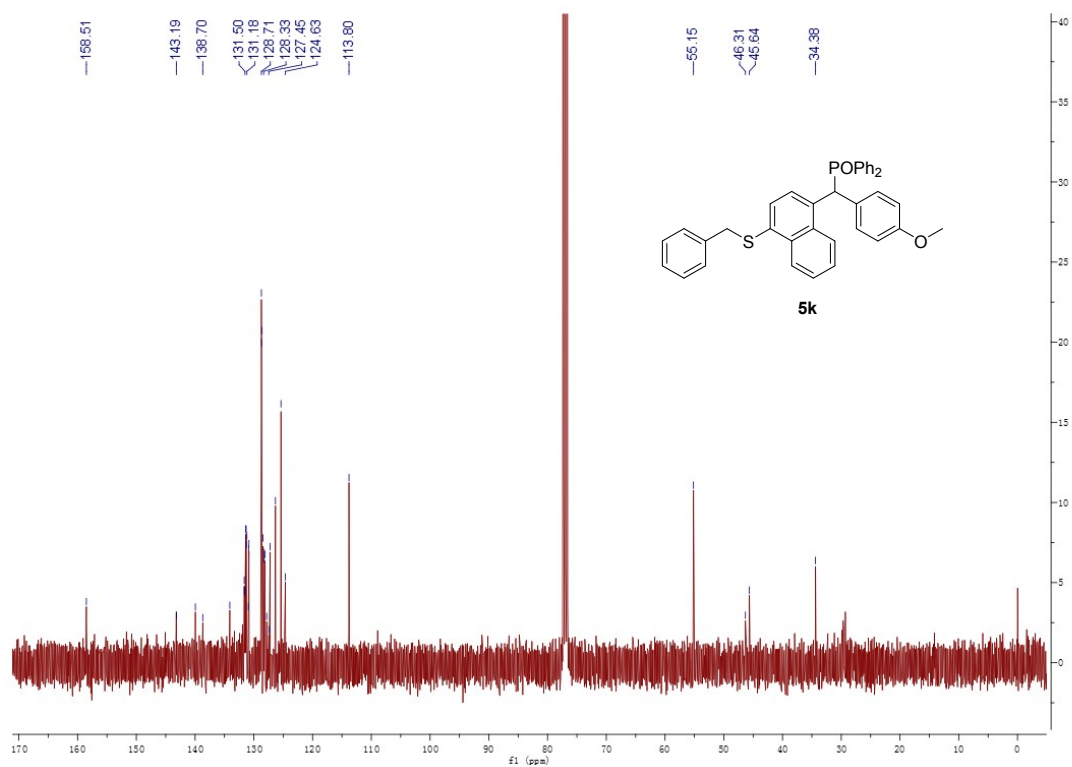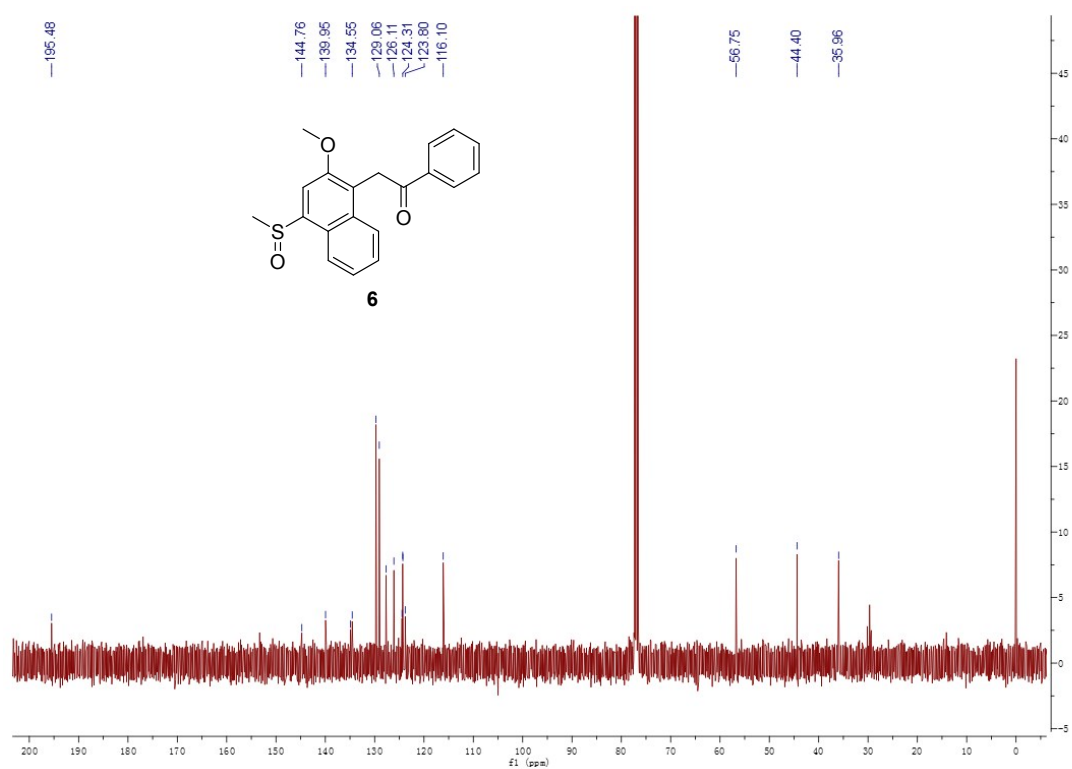

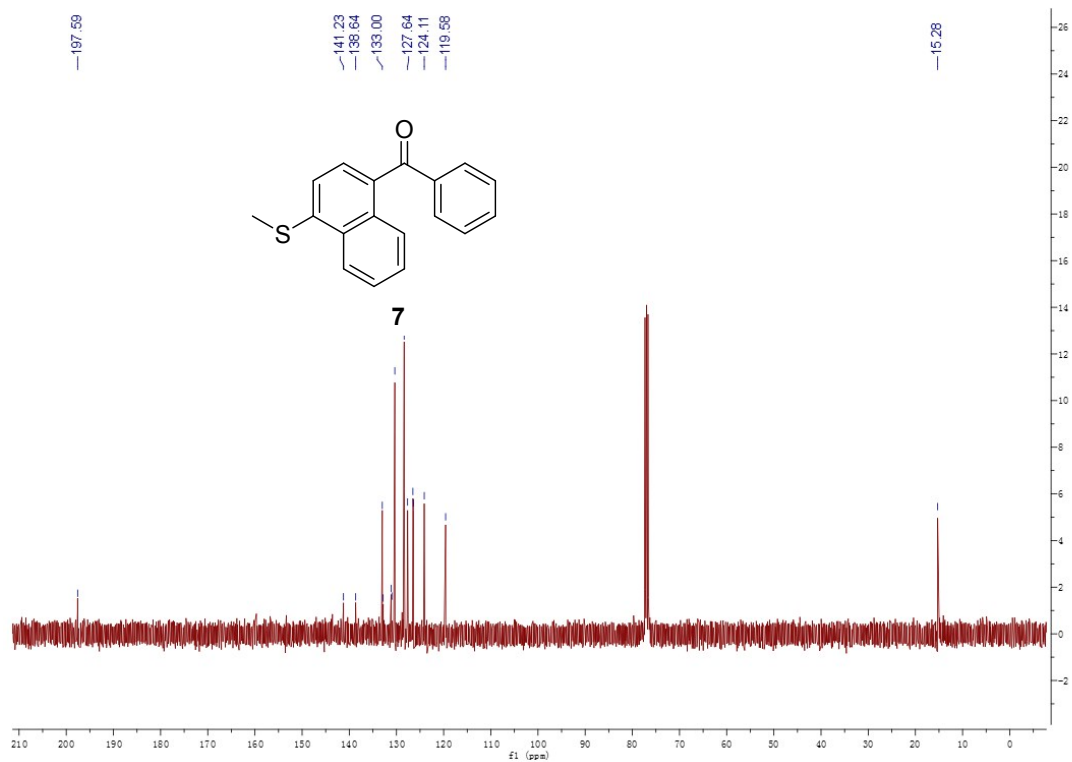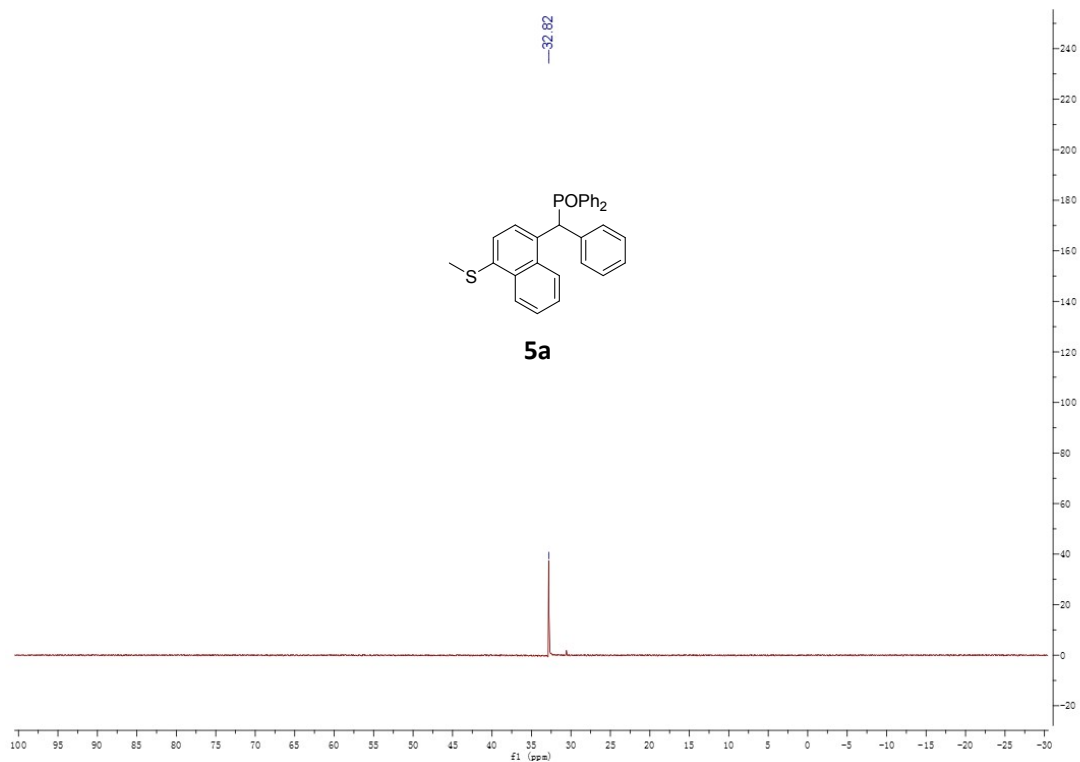

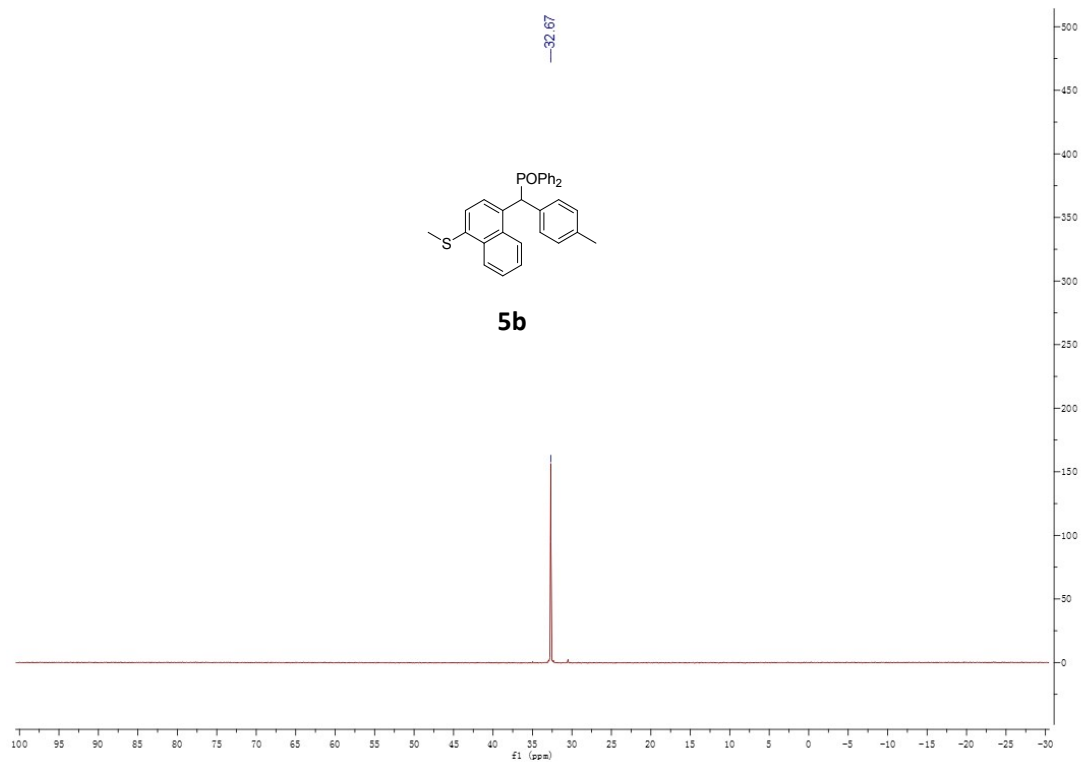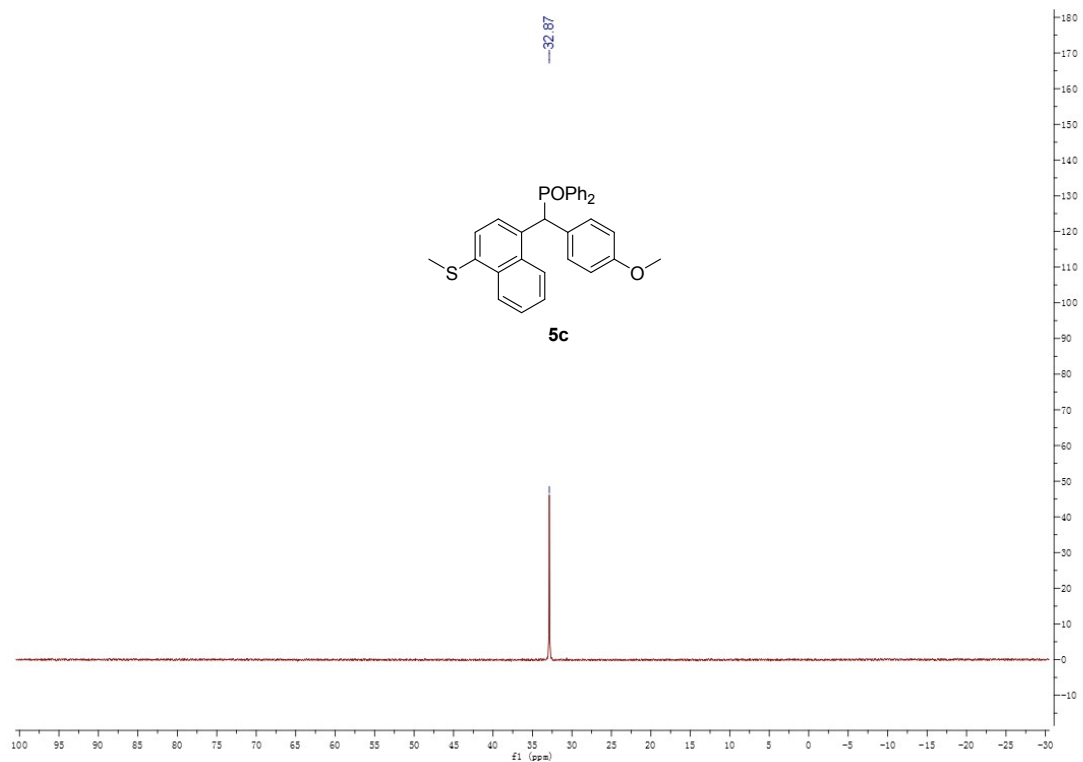

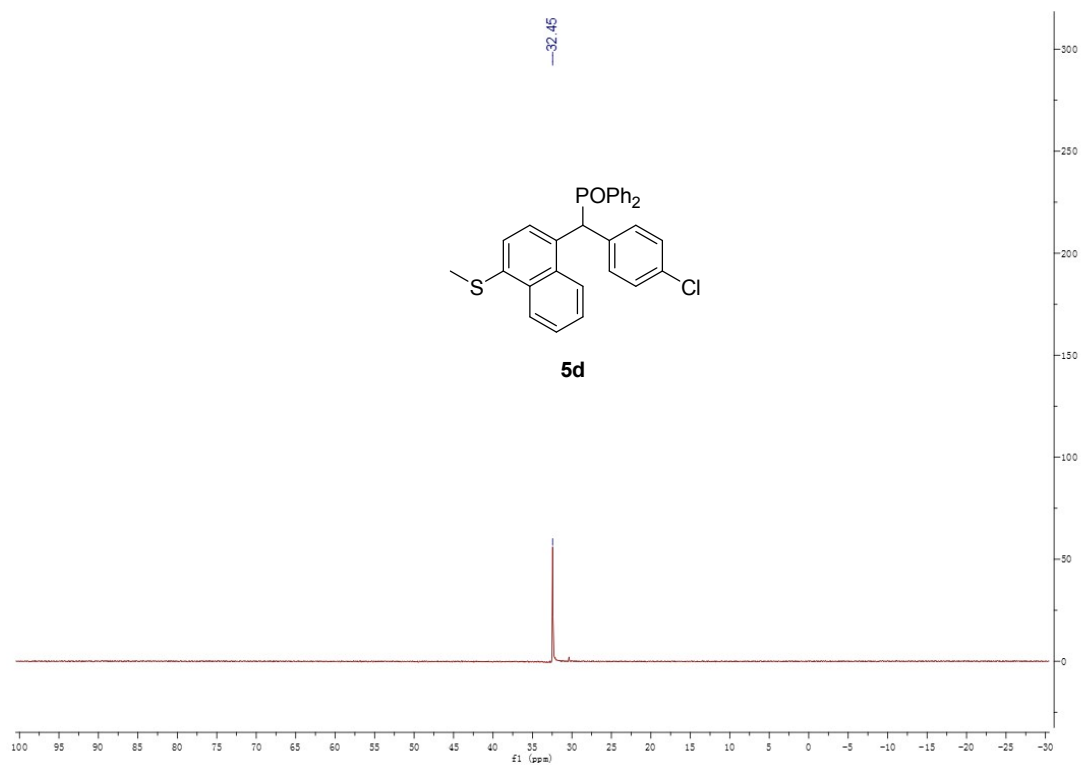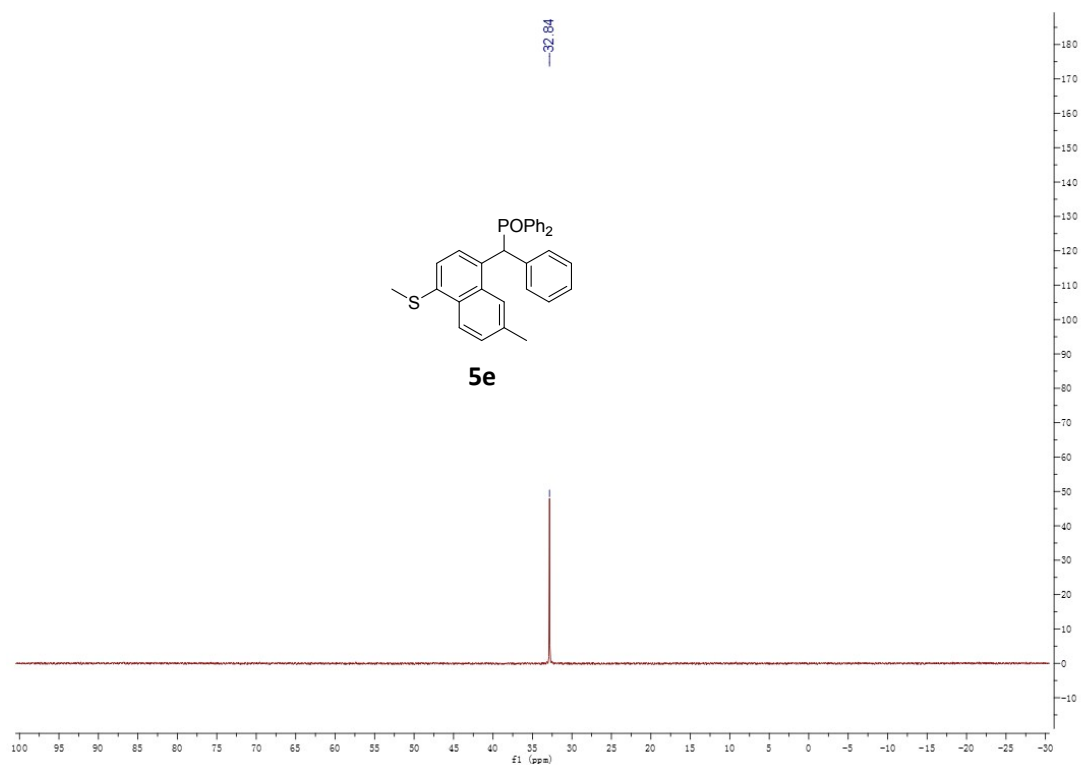

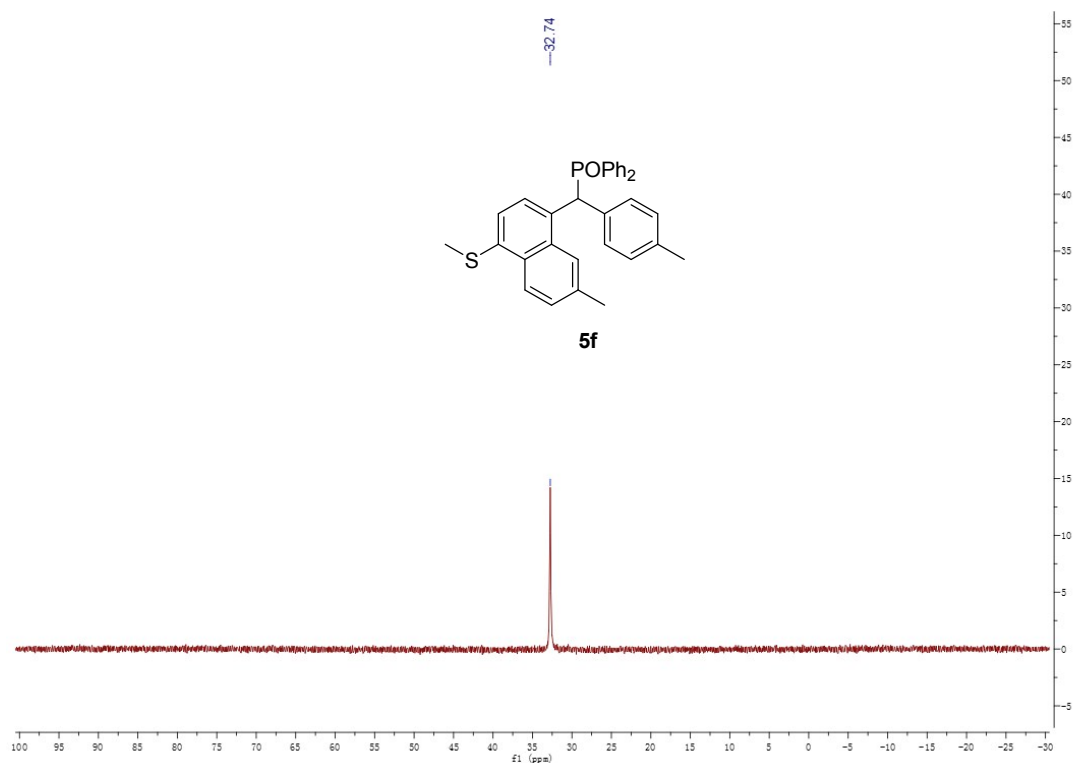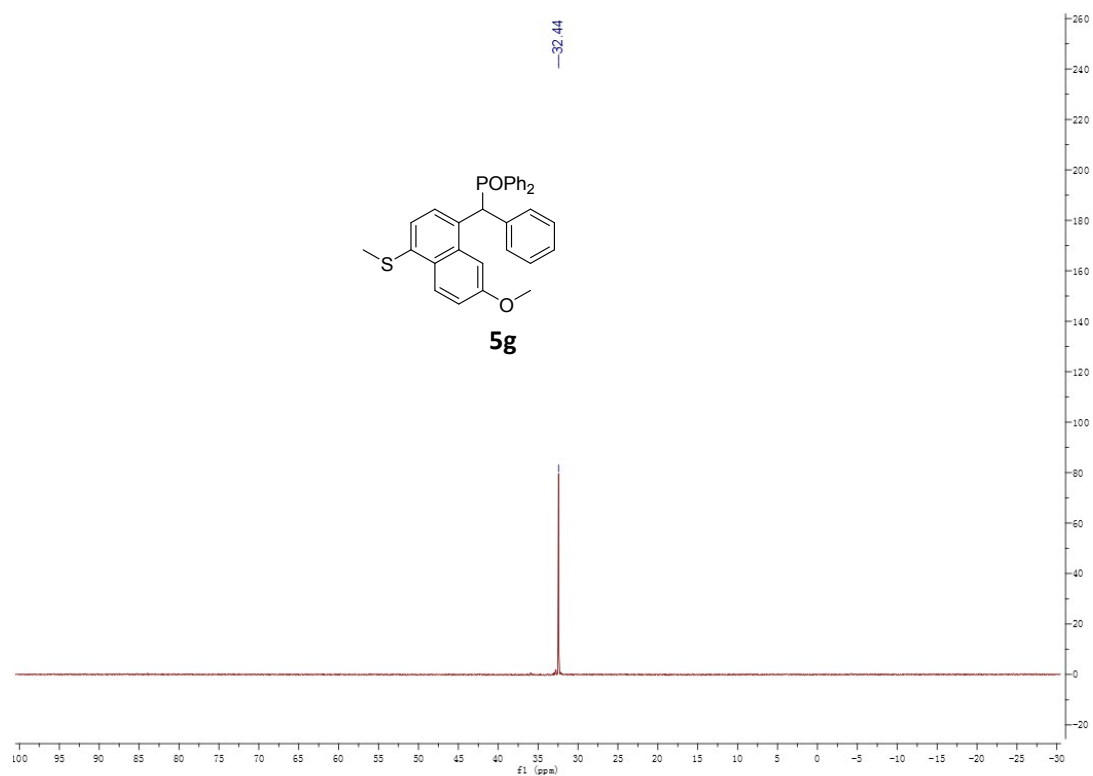

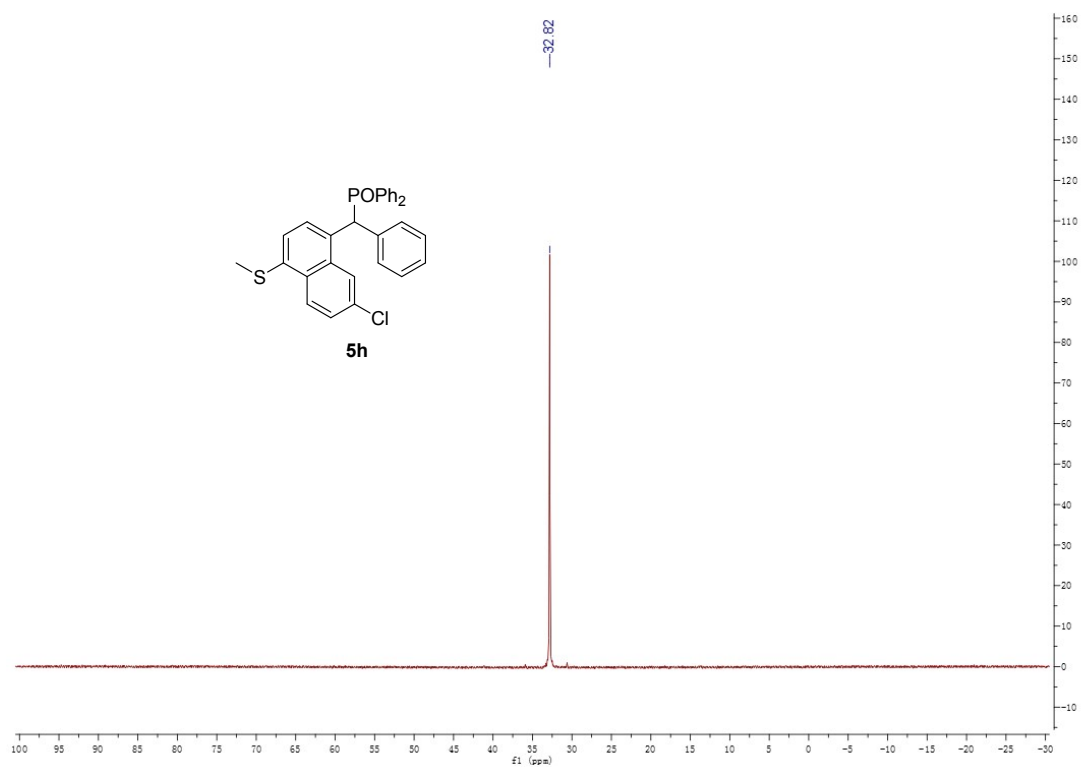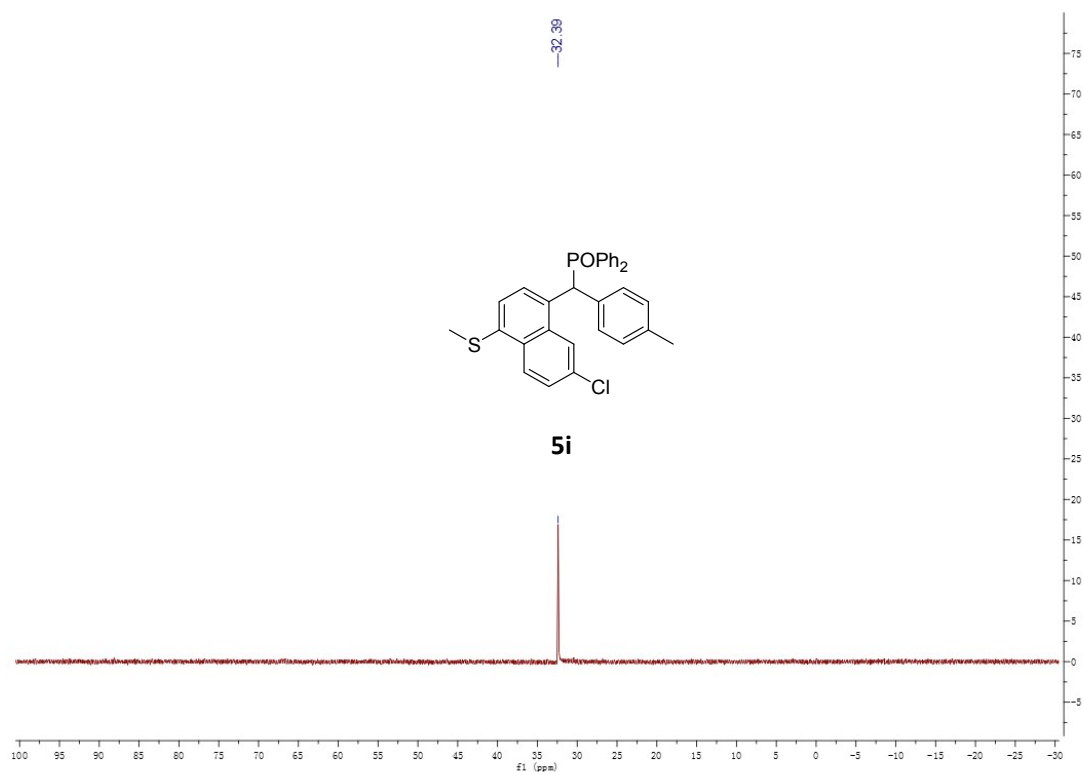

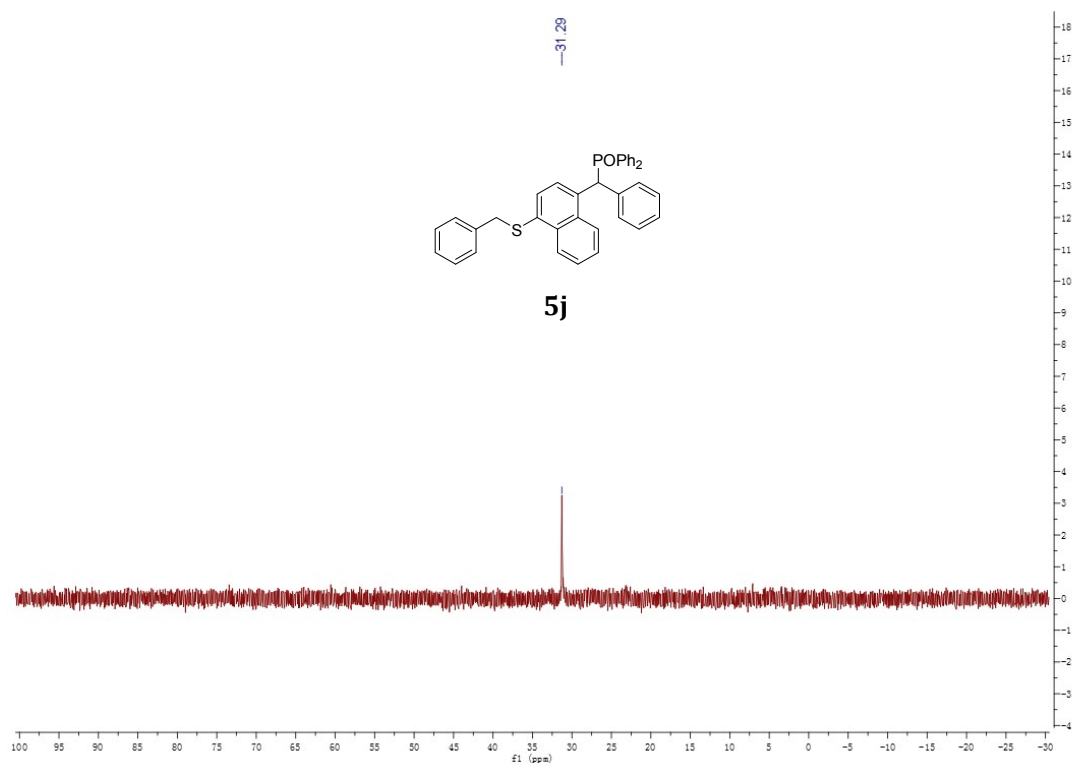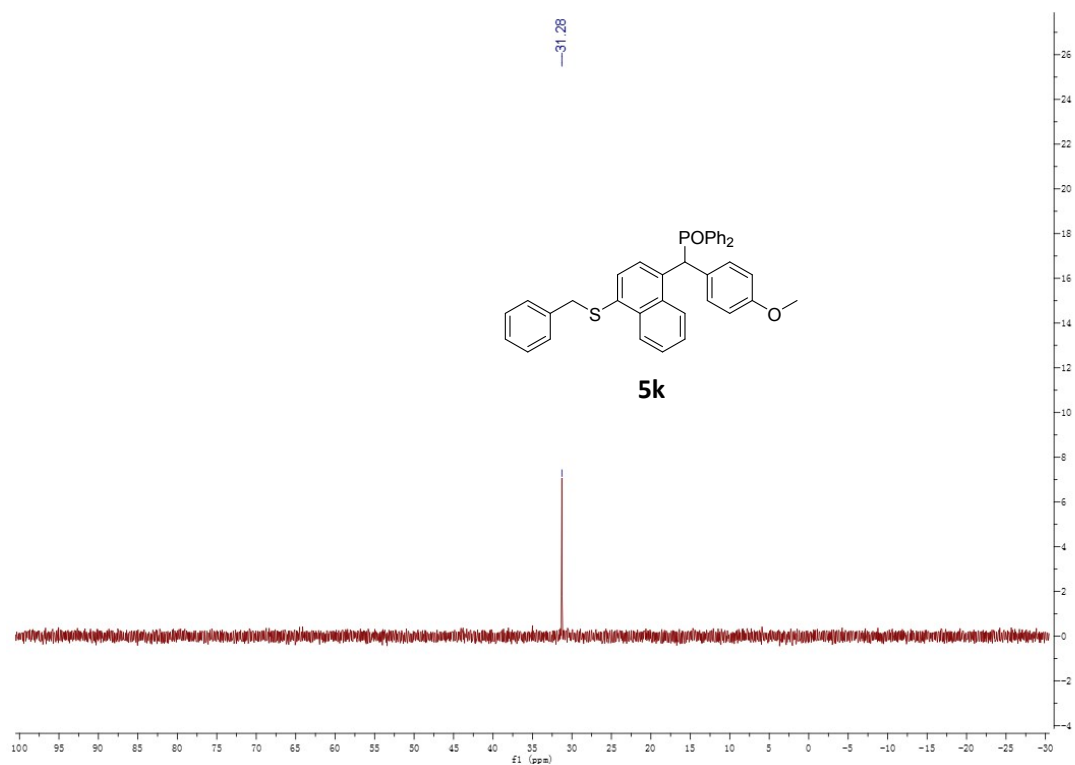

Supplement: c6ra21889j1.pdf [file c6ra21889j1.pdf]
